# Supplementary material
Source: PubMed Central journal article supplement (PMC10091853)
Supplement: NIHMS1885204-supplement-validity_paper_supp_matter.pdf [file NIHMS1885204-supplement-validity_paper_supp_matter.pdf]

## Identification

Record ID - this will be assigned based on site and number for data entry - using REDCap permissions for multi-site studies

---

**Data will come from the UHC/Vizient CDB/RM excel data file, which has been run through Stata matching. Data for this instrument will either be at the far left or the far right of the csv data file.**

Patient ID (Medical Record Number)

(number - e.g. 8112233 )

Encounter Number

(number - e.g. 941100416082. If the number displays oddly (e.g. "9.50004E+11" either double click on the cell to convert it to a true number or right click and format cell as a number with no decimal points))

Case\_Control - identifies the patient as either a case or a control (listed in the "case" column of the xls file)

Case  
 Control  
(indicate if patient is a case (PSI 11 + = 1) or a control (PSI 11 - = 0) per UHC CDB)

Medicare ID (Hospital Identifier)

UCD - 050599  
 UCSF - 050454  
 UCI - 050348  
 UCLA\_RR - 050262  
 UCSD - 050025  
(Identifies the site (in addition to the record ID auto-assignment) Necessary due to REDCap DAG restrictions on data entry and site auto-assignment. \*Note: may not function as described in REDCap training due to 3 abstractors assigned to 4 sites)

ID as identified from Stata match (listed in the "id" column of the csv file)

(whole number - e.g. "51", "2356", etc.. These numbers are assigned by the PI when doing the stata match function. Numbers are not distinct per site, so it is important to have both the "id" and the "medicare\_id" to reference back to the master key document.)

ICD version

ICD-9 (through 3Q15)  
 ICD-10 (from 4Q15 onward)

Clinical classification software (CCS) bin (listed in the "newccs" column in the csv file)

(Precise CCS code - from matching data file created in Stata \*\*\* Labeled "new\_ccs" or "newccs" from xls file (from study PI). Enter precisely as displayed in the xls document (e.g. "121", "14.13.1"))

Age Bin ("age\_bin" or "agecat" in csv file)

(binned by decade (from matching xls data file). This will be a single number (integer): e.g. "5" if the patient is in their 50s)

Match ("match")

(match number for the matched PAIR (from matching xls data file). This will be an integer: e.g. "18". Numbers are not distinct per site, so it is important to have both the "match" and the "medicare\_id".)

Match ID ("match\_id")

(the identifier (id) for the PARTNER in the pair (from the matching xls data file). whole number - e.g. "51", "2356", etc.. These numbers are assigned by the PI when doing the stata match function. Numbers are not distinct per site, so it is important to have both the "match id" and the "medicare\_id" to reference back to the master key document.)

Abstracter initials

(use three letters - e.g. "jcs")

---



---

**Positive Predictive Value (contains: TP, FP, TN, FN to calculate PPV, NPV, Sensitivity, Specificity) \*\*This section to be completed by UCD PI**

Coding Case (TP v. FP) - identifies the patient as a true case based on coded data. All controls are marked "N/A".

- False Positive
- True Positive
- N/A patient is a control (not a case)  
(If patient is a control, check "N/A". Otherwise done by PI, clinical/documentation judgment (e.g. was the patient reported as a PSI-11 case to UHC but, based on exclusion criteria, should not have been reported?))

Clinical Case (TP v. FP) - identifies the patient as a true case based on clinical data. All controls are marked "N/A".

- False Positive
- True Positive
- N/A patient is a control (not a case)  
(If patient is a control, check "N/A". Otherwise done by PI, clinical judgment (e.g. Does the patient meet clinical criteria for having postoperative respiratory failure even if PSI-11 exclusion criteria are present?))

POD Diagnosis

(from procedure code (or dx code notes if no proc code))

Coding Control (TN v. FN) - identifies the patient as a true control based on coded data. All cases are marked "N/A".

- False Negative
- True Negative
- N/A patient is a case (not a control)  
(If patient is a control, check "N/A". Otherwise done by PI, clinical/documentation judgment (e.g. was the patient reported as a PSI-11 case to UHC but, based on exclusion criteria, should not have been reported?))

Clinical Control (TN v. FN) - identifies the patient as a true control based on coded data. All cases are marked "N/A".

- False Negative
- True Negative
- N/A patient is a case (not a control) (If patient is a control, check "N/A". Otherwise done by PI, clinical/documentation judgment (e.g. was the patient reported as a PSI-11 case to UHC but, based on exclusion criteria, should not have been reported?))

51851 PPV and NPV

- True Positive
- False Positive
- True Negative
- False Negative (Acute respiratory failure following trauma and surgery)

51853 PPV and NPV

- True Positive
- False Positive
- True Negative
- False Negative (Acute and chronic respiratory failure following trauma and surgery)

9672 PPV and NPV

- True Positive
- False Positive
- True Negative
- False Negative (Continuous MV for 96 consecutive hours or more; 0 or more days post op)

9671 PPV and NPV

- True Positive
- False Positive
- True Negative
- False Negative (Continuous MV for less than 96 consecutive hours; 2 or more days post op)

9670 PPV and NPV

- True Positive
- False Positive
- True Negative
- False Negative (Continuous MV of unspecified duration; 2 or more days post op)

9604 PPV and NPV

- True Positive
- False Positive
- True Negative
- False Negative (Insertion of endotracheal tube; 1 or more days post op)

Comments for this instrument and this abstraction

---

# UHC/Vizient

---

---

**UHC-Vizient Data: All fields are REQUIRED and come directly from the CDB/RM xls report, which has been run through Stata matching to create the csv data file. Data fields are listed in the order in which they appear in the CDB/RM report to facilitate efficient and accurate data entry. Drop down options are as they appear in the CDB/RM report. For all text fields, it is easier and more accurate to copy and paste from the UHC/Vizient xls.**

Admission Date

(The calendar date the patient was admitted to the facility. MM-DD-YYYY)

Admission Day

- Sunday  
 Monday  
 Tuesday  
 Wednesday  
 Thursday  
 Friday  
 Saturday

(The day of the week on which the patient was admitted to the hospital. select one )

Admission Source

- Clinic referral  
 Non-facility point of origin  
 Transfer from a different hospital  
 Transfer from another facility  
 Transfer from another Home Health Referral  
 Transfer from skilled nursing facility or ICF  
 Transfer from inpatient care in same facility  
 Court/Law Enforcement: STOP data collection  
 Other

(Select from the dropdown menu)

Admission Source - Other

(Copy and paste from the UHC/Vizient xls. The referral source for the admission.)

Admission Status

- Elective  
 Emergent

(Indicates the priority of the visit/admission - elective or emergent. Only eligible if elective)

Age

(This field represents the age of the patient upon admission. This is a UHC calculated field based on date of birth and date of admission. Years as listed in UHC data file - enter numbers only e.g. "64")

Sex (gender)

- Female  
 Male

(The gender of the patient. Male or female)

- Race
- White
  - Black
  - Asian
  - Other
- (Patient's racial background as reported. select one )
- Ethnicity
- Non Hispanic Origin
  - Hispanic Origin
  - Unavailable
  - Not reported
- (select one )
- Vizient Primary Payer
- 
- (Copy and paste from the UHC/Vizient xls. As identified by the hospital as being chiefly responsible for payment and mapped to UHC's generic lexicon of payers (ie Commercial, Medicare, etc.) to allow for comparable reporting across Hospitals. )
- Vizient Primary Payer Bin
- Medicare
  - Medicaid
  - Private or Commercial Insurance (inc. PPO, HMO)
  - Military/VA
  - All Others
- (new variable created for analysis. Select one of the options based on the response to the previous question)
- Admit APR-DRG
- 
- (three digit number - e.g. 440. The APR-DRG (all patient refined diagnosis related group) as calculated by the 3M APR grouper software to reflect the patient's condition at admission, any diagnosis with POA "NO" is excluded. More information can be found on the 3M Web site.)
- MS-DRG
- 
- (three digit number - e.g. 652. Medicare-severity diagnosis-related group. MS-DRGs were created by the Centers for Medicare & Medicaid Services (CMS) to classify patients into clinically cohesive groups that demonstrate similar consumption of hospital resources and length of stay patterns. MS-DRGs can be designated as either medical or surgical.)
- Base MS-DRG
- 
- (three digit number - e.g. 209. The CMS value is the combination of individual MS-DRGs for the same condition or procedure regardless of MCCs and/or CCs.)

## Vizient Service Line

(Copy and paste from the UHC/Vizient xls. UHC-defined groups of MS-DRGs that make up clinical cohorts. UHC subservice lines are further divisions of the service lines provided to assist in drilldown. The 2014 UHC service lines are available in the CDB/RM Learning Center on the UHC Web site (<https://www.uhc.edu/17771>). UHC bases this on the DRG - so, may not match how the hospital site defines the actual svc lines. \*\*These are defined by UHC in an xls crosswalk - long list, updated yearly. Easiest to copy text from xls file and bin them during analysis prn since many in the list will likely not appear in our dataset, but would only create an unwieldy drop down list..)

## Vizient Sub-Service Line

(Copy and paste from UHC/Vizient xls. UHC-defined groups of MS-DRGs that make up clinical cohorts. UHC subservice lines are further divisions of the service lines provided to assist in drilldown. The 2014 UHC service lines are available in the CDB/RM Learning Center on the UHC Web site (<https://www.uhc.edu/17771>). UHC bases this on the DRG so, may not match how the hospital site defines the svc/subservice lines (the site/facility service line for admitting and discharge are entered in the "EHR" instrument). UHC bases this on the DRG - so, may not match site svc lines (the site/facility service line for admitting and discharge are entered in the "EHR" instrument). See comments above after "\*\*")

## Admit Severity of Illness

- Minor
  - Moderate
  - Major
  - Extreme
  - No Class Specified
- (The APR-DRG SOI (severity of illness) as calculated at the time of admission using the 3M grouper, any diagnosis with POA "NO" is excluded. More information can be found on the 3M Web site. select one )

## Relative Expected Mortality (2015 Risk Model [AMC])

- Well Below
  - Below
  - Equal to
  - Above
  - Well Above
  - Unavailable
- (select one - Relative Expected Mortality (REM) is a qualitative description of a patient's % expected mortality in comparison to other patients in the same model group. More information is available in the Risk Adjustment Methodology information on the CDB/RM Learning Center on the UHC Web site (<https://www.uhc.edu/17771>).)

Admit Risk of Mortality

- Minor
  - Moderate
  - Major
  - Extreme
  - No Class Specified
- (The APR-DRG ROM (risk of mortality) as calculated at the time of admission using the 3M grouper, any diagnosis with POA "NO" is excluded. More information can be found on the 3M Web site. select one )

Discharge MD Specialty

(Copy and paste from UHC/Vizient xls. Represents the specialty of the discharge physician as defined by the hospital. See sub-analysis note above. \*\*Tech Specs, Appendix A had a 2-page list. A drop down would be cumbersome for data entry and many specialties may not appear in this study - easiest to copy/paste from Vizient xls file and bin later for analysis prn.)

Discharge MD Specialty - Bin

- Anesthesia
- Allied Health Professional
- Dermatology
- Emergency Medicine
- Family Practice/General Practice
- Internal Medicine
- Neurology
- Obstetrics/Gynecology
- Palliative Care
- Pathology
- Pediatrics
- Physical Medicine/Rehab
- Psychiatry
- Radiology
- Surgery
- Urology
- Not Elsewhere Classified
- Unknown

(Bin based on Consolidated Patient Data Feed Specification v7.0 Appendix A overarching categories for specialties listed above. All data for the MD Specialty "Bins" are in teh file located in the REDCap File Repository.)

Discharge Date

(The calendar date on which patient was discharged from or transferred out of the facility. MM-DD-YYYY)

Discharge Day

- Sunday
- Monday
- Tuesday
- Wednesday
- Thursday
- Friday
- Saturday

Discharge Status

- Disch/transf to another rehab facility including rehab distinct part units of a hospital
- Discharged to home care or self care (routine discharge)
- Discharged/transferred to another short term general hospital for inpatient care
- Discharged/transferred to home under care of organized home health service
- Discharged/transferred to long term care hospital (LTCH)
- Discharged/transferred to skilled nursing facility (SNF) with Medicare certification
- Expired (all in-hospital deaths except for Medicare or CHAMPUS hospice patients)
- Left against medical advice or discontinued care
- Hospice - Home
- Unknown
- Other

(This is the patient status on the discharge date as listed on the record. It is based on the standard set of UB04 codes for Discharge Status. Options for this field do change please review your UB04 definitions for the most up to date available fields. Select one )

Discharge Status - Other

\_\_\_\_\_  
(type exactly as it appears in the UHC data file (there are 1.5 pages of possible options in the Appendix A))

In Hospital Mortality

- No
  - Yes
- (based on "Discharge Status" above - "expired" = yes to In Hospital Mortality)

Early Death

- No
  - Yes
- (Inpatient deaths within 2 days of admission. UHC will calculate this based on days, not hours. )

Total Cost Observed (2015 Risk Model)

\_\_\_\_\_  
(numbers only, no \$ or other sign: e.g. "\$63,233" is entered as 63233. \*includes direct (related to patient care) and indirect ( includes capital and building costs) costs for an individual encounter)

LOS Observed

\_\_\_\_\_  
(Actual LOS for an individual patient encounter. Whole number for days - e.g. 5)

Charges Observed

\_\_\_\_\_  
(Observed charges for the individual encounter/visit. Numbers, no \$ sign: e.g. "\$63,233" is entered as 63233)



ICU Days Obs

(\*This data filed is missing from the UHC/Vizient data file. Leave it blank. Explanation of the field: The total "whole" number of days the patient spent in an intensive care unit (ICU) while in the hospital. This field is determined by the hospital, not calculated by UHC. Enter whole number for days - e.g. 2. This value will be a legacy value, replaced by the "ICU File" value (which uses start/end/type ICU data fields). When ICU Days are removed from UHC, only the ICU File value will remain.)

ICU Days Total Obs from ICU File

(When ICU Days are removed from UHC, only the ICU File value will remain. Enter whole number for days - e.g. 1. Blank = 0)

LOS Outlier (2015 Risk Model (AMC))

 No Yes

(The LOS Outlier Flag is applied to an encounter when the observed LOS is greater than the 99th percentile within the base MS-DRG. The 99th percentile by base MS-DRG is determined by the normative data set used for risk modeling. This is not based on CMS outlier thresholds for individual MS-DRGs. In the report output, when applicable the number of cases is followed in parenthesis by the number of LOS outliers. Yes or no)

Direct Cost Expected (2015 Risk Model (AMC))

(The expected direct costs for an individual encounter based on the UHC Risk Model. UHC organizes discharges based on DRGs or Base MS-DRGs for the Risk Model Groups. Expected values are unique to each patient and based on clinical characteristics (such as co-morbidities, diagnoses, and other patient demographics). Refer to the CDB/RM Learning Center on the UHC Web site (<https://www.uhc.edu/17771>) for more detail on the Risk Model Process. Numbers, no \$ sign: e.g. "\$63,233" is entered as 63233)

LOS Expected (2015 Risk Model (AMC))

(The expected LOS as calculated by the UHC MS-DRG-based risk model for Length of Stay. Refer to the risk adjustment methodology materials on the CDB/RM Learning Center on the UHC Web site (<https://www.uhc.edu/17771>). This number will be something like "5.1826")

Mortality Expected (2015 Risk Model (AMC))

(Appears in the Case Profile Report; the expected mortality for the case as predicted by the MS-DRG-based mortality risk model for the year selected (current and previous year are available). The CDB/RM tool supports two risk model groups within the tool at any given time. Refer to UHC's risk adjustment methodology for more information. Number < 1. e.g. 0.00043)

Direct Cost Observed (2015 Risk Model)

(The direct costs for an individual encounter. The direct costs are those costs related to the patient care. This is based on a ratio of cost to charges. Refer to the CDB/RM Learning Center on the UHC Web site (<https://www.uhc.edu/17771>) for most current methodology. Numbers, no \$ sign: e.g. "\$63,233" is entered as 63233)

REM Model Observed (2015 Risk Model (AMC))

(The mean observed value for the mortality model group. Compare to the REM for the pt (explained above). Number < 1. e.g. 0.00037)

ICD-9-CM or ICD-10-CM Dx Code 1 from UHC

(No decimal point, letters and numbers. ICD-9 example: 220. ICD-10 example: m5032. \*\*\*For example, in the UCD file this is found in column AT and labeled "ICD9\_Diagnosis1")

ICD-9-CM or ICD-10-CM Dx Code 1 Description from UHC

(Words only, no caps. ICD-9 example: benign ovarian neoplasm. ICD-10 example: other cervical disc degeneration, mid-cervical region.)

ICD-9-CM or ICD-10-PCS Procedure Code 1 from UHC ("Index\_Therapeutic\_Procedure" code - used for CCS bins and case-control matching)

(No decimal point, letters and numbers. ICD-9 example: 6549. ICD-10 example: 0rg20a0. \*\*\*\*NOTE: Use the column labeled "Index\_Therapeutic\_Procedure". For the UCD file this is column AEA )

ICD-9-CM or ICD-10-PCS Procedure Code 1 Description from UHC ("Index\_Therapeutic\_Procedure" code - used for CCS bins and case-control matching)

(Words only, no caps. ICD-9 example: unilaterals-o nec. ICD-10 example: fusion 2-6 c jt w intbd dev, ant appr a col, open. \*\*\*\*NOTE: Use the column labeled "Index\_Therapeutic\_Procedure". For the UCD file this is column AEA )

Procedure Code 1 Date from UHC ("Index\_Therapeutic\_Procedure" code - used for CCS bins and case-control matching)

(MM-DD-YYYY)

Procedure Code 1 MD Specialty from UHC

(Copy from the csv file. The physician responsible for the primary procedure as reported by the hospital. \*\*NOTE: you will need to look for the code listed as the "Index\_Therapeutic\_Procedure" and then look for this exact code in the "ICD\_Procedure x" columns to find the exact same procedure code. From that procedure code column (which will usually be "ICD\_Procedure1", but may be 2 or 3), look about 3 columns to the right for the MD specialty for the procedure. Copy from the csv file into this data field.)

Procedure Code MD Specialty - Bin

- Anesthesia
- Allied Health Professional
- Dermatology
- Emergency Medicine
- Family Practice/General Practice
- Internal Medicine
- Neurology
- Obstetrics/Gynecology
- Palliative Care
- Pathology
- Pediatrics
- Physical Medicine/Rehab
- Psychiatry
- Radiology
- Surgery
- Urology
- Not Elsewhere Classified
- Unknown

(Bin based on Consolidated Patient Data Feed Specification v7.0 Appendix A overarching categories for specialties listed above)

Admitting - Physician Specialty 1 - Service Line

(Copy and paste from UHC/Vizient xls file "PhysicianRole1" = Admitting, use column labeled "PhysicianSpecialty1". This appears ~column YT in the cases file and ~column AEI in the controls file. The location may be slightly different in the Stata file)

Admitting MD Specialty - Bin

- Anesthesia
- Allied Health Professional
- Dermatology
- Emergency Medicine
- Family Practice/General Practice
- Internal Medicine
- Neurology
- Obstetrics/Gynecology
- Palliative Care
- Pathology
- Pediatrics
- Physical Medicine/Rehab
- Psychiatry
- Radiology
- Surgery
- Urology
- Not Elsewhere Classified
- Unknown

(Bin based on Consolidated Patient Data Feed Specification v7.0 Appendix A overarching categories for specialties listed above)

Comments for this instrument and this abstraction

---

## Outcome UHC/Vizient

**UHC/Vizient Outcome (all fields are required for all CASES and come directly from the CDB/RM report). For CONTROLS, only mark the first question as "N/A" - no further data collection is required.**

ICD Version for UHC Outcome

- ICD-9  
 ICD-10  
 N/A - patient is a control (not a case) \*\*No further data collection is necessary for this instrument - mark this form as complete (branching logic is used to simplify data entry based on ICD-9 or ICD-10 codes )

**ICD-9 \*\*NOTE: The first procedure code date (the date nearest the admission date) is the date to use for calculating post-operative days and/or pre-diagnosis days. Diagnosis codes 51851 and 51853 will NOT have a date. If there are dates for re-intubation (9604) AND mechanical ventilation (9672, 9671, and/or 9670) use the mechanical ventilation code and date that appears nearest to the admission date.**

ICD-9 51851 Diagnosis Present?

- Yes  
 No  
 (518.51 - Acute Respiratory Failure Following Trauma and Surgery (any secondary ICD-9-CM diagnosis code for acute respiratory failure))

ICD-9 51853 Diagnosis Present?

- Yes  
 No  
 (518.53 - Acute and Chronic Respiratory Failure Following Trauma and Surgery (any secondary ICD-9-CM diagnosis code for acute and chronic respiratory failure))

ICD-9 9672 Procedure Present?

- Yes  
 No  
 ((96.72) Continuous mechanical ventilation for 96 consecutive hours or more - any-listed ICD-9-CM procedure codes for a mechanical ventilation for 96 consecutive hours or more that occurs zero or more days after the first major operating room procedure code (based on days from admission to procedure))

ICD-9 9672 Procedure Date - FIRST in chronological order

((96.72) Date will be located in the xls file (generally 2 columns to the right of the code).  
 \*\*Enter the FIRST date in chronological order.  
 \*If there are additional/subsequent (e.g. 2nd and 3rd) codes and dates, enter the codes and dates in the "comments field" below)

ICD-9 9671 Procedure Present?

- Yes  
 No  
 ((96.71) Continuous mechanical ventilation for less than 96 consecutive hours - any-listed ICD-9-CM procedure codes for a mechanical ventilation for less than 96 consecutive hours that occurs two or more days after the first major operating room procedure code (based on days from admission to procedure))

ICD-9 9671 Procedure Date - FIRST in chronological order

\_\_\_\_\_  
 ((96.71) Date will be located in the xls file (generally 2 columns to the right of the code).  
 \*\*Enter the FIRST date in chronological order.  
 \*If there are additional/subsequent codes and dates, note these in the "comments" box.)

ICD-9 9670 Procedure Present?

- Yes  
 No  
 ((96.70) Continuous mechanical ventilation of unspecified duration - any-listed ICD-9-CM procedure codes for a mechanical ventilation for an undetermined number of hours that occurs two or more days after the first major operating room procedure code (based on days from admission to procedure))

ICD-9 9670 Procedure Date - FIRST in chronological order

\_\_\_\_\_  
 ((96.70) Date will be located in the xls file (generally 2 columns to the right of the code).  
 \*\*Enter the FIRST date in chronological order.  
 \*If there are additional/subsequent codes and dates, note these in the "comments" box.)

ICD-9 9604 Procedure Present?

- Yes  
 No  
 ((96.04) Insertion of an endotracheal tube - any-listed ICD-9-CM procedure codes for a reintubation that occurs one or more days after the first major operating room procedure code (based on days from admission to procedure))

ICD-9 9604 Procedure Date - FIRST in chronological order

\_\_\_\_\_  
 ((96.04) Date will be located in the xls file (generally 2 columns to the right of the code).  
 \*\*Enter the FIRST date in chronological order.  
 \*If there are additional/subsequent codes and dates, note these in the "comments" box.)

---

**ICD-10 \*\*Note, enter the date for the FIRST procedure in chronological order (nearest the first operative procedure/date of admission)**

ICD-10 J95821 Diagnosis Present?

- Yes  
 No  
 (any secondary ICD-10-CM diagnosis code for acute Postprocedural respiratory failure)

ICD-10 J95822 Diagnosis Present?

- Yes  
 No  
 (any secondary ICD-10-CM diagnosis code for acute and chronic Postprocedural respiratory failure)

ICD-10 5A1955Z Procedure Code

- Yes
  - No
- (any-listed ICD-10-PCS procedure codes for a mechanical ventilation for 96 consecutive hours or more that occurs zero or more days after the first major operating room procedure code (based on days from admission to procedure);)

ICD-10 5A1955Z Procedure Date

\_\_\_\_\_

ICD-10 5A1945Z Procedure Code

- Yes
  - No
- (any-listed ICD-10-PCS procedure codes for a mechanical ventilation for 24-96 consecutive hours that occurs two or more days after the first major operating room procedure code (based on days from admission to procedure);)

ICD-10 5A1945Z Procedure Date

\_\_\_\_\_

ICD-10 0BH13EZ Procedure Code

- Yes
  - No
- (Insertion Of Endotracheal Airway Into Trachea, Percutaneous Approach (any-listed ICD-10-PCS procedure codes for a reintubation that occurs one or more days after the first major operating room procedure code (based on days from admission to procedure)))

ICD-10 0BH13EZ Procedure Date

\_\_\_\_\_

ICD-10 0BH17EZ Procedure Code

- Yes
  - No
- (Insertion Of Endotracheal Airway Into Trachea, Via Natural or Artificial Opening (any-listed ICD-10-PCS procedure codes for a reintubation that occurs one or more days after the first major operating room procedure code (based on days from admission to procedure)))

ICD-10 0BH17EZ Procedure Date

\_\_\_\_\_

ICD-10 0BH18EZ Procedure Code

- Yes
  - No
- (Insertion Of Endotracheal Airway Into Trachea, Via Natural or Artificial Opening Endoscopic (any-listed ICD-10-PCS procedure codes for a reintubation that occurs one or more days after the first major operating room procedure code (based on days from admission to procedure)))

ICD-10 0BH18EZ Procedure Date

\_\_\_\_\_

Comments for this instrument and this abstraction

\_\_\_\_\_

# Procedure Dates/Times

**Dates/Times to be collected by data abstractors. \*Study PI will use these data in conjunction with the date/time of the index therapeutic procedure, presence of PRF Diagnosis codes (51851, 51853), and presence of PRF procedure codes (9604, 9670, 9671, 9672) to determine TP v. FP case for PPV calculations.**

Ventilator 1: date/time of first ventilator initiation \_\_\_\_\_

Ventilator 1: date/time of first ventilator discontinuation \_\_\_\_\_

Ventilator 2: date/time of 2nd ventilator initiation \_\_\_\_\_

Ventilator 2: date/time of 2nd ventilator discontinuation \_\_\_\_\_

Ventilator 3: date/time of 3rd ventilator initiation \_\_\_\_\_

Ventilator 3: date/time of 3rd ventilator discontinuation \_\_\_\_\_

Intubation 1: date/time of 1st endotracheal intubation initiation/placement \_\_\_\_\_

Extubation 1: date/time of 1st endotracheal intubation removal \_\_\_\_\_

Intubation 2: date/time of 2nd endotracheal intubation initiation/placement \_\_\_\_\_

Extubation 2: date/time of 2nd endotracheal intubation removal \_\_\_\_\_

Intubation 3: date/time of 3rd endotracheal intubation initiation/placement \_\_\_\_\_

Extubation 3: date/time of 3rd endotracheal intubation removal \_\_\_\_\_

Procedure Dates/Times - Comments

(example: Airway (other than endotracheal tube) placed and discontinued: We are looking for insertion and removal of an "endotracheal tube" - a tube that goes into the trachea. If the tube is an endotracheal or ET tube, there is no need for clarification. If the tube is a tracheostomy tube, please indicate this in the comments. In this example, you would document "Airway 8 Shiley, Cuffed placed 10/23/16 at 1330")

## Demographics EHR

**Demographics - EHR (All fields are required, except middle name. Obtained from the hospital site's medical record - typically an electronic health record. Sources of data will include Nurses Notes, Physician Notes, Surgery/Anesthesia/Operating Room Notes.). \*\*NOTE: for all numbers (e.g. weight in kg, height in cm, etc.) - DOCUMENT the NUMBER ONLY. For example "74.5 kg" is documented as: 74.5**

Admitting Service

\_\_\_\_\_  
(Retained variable as svc from site may differ from UHC DRG-based service attributions. Typically located in the physician's History & Physical (H&P), but may also be listed toward the top of the Discharge Summary (admitting and discharge services are often listed).)

Discharge Service

\_\_\_\_\_  
(Typically located in the physician's Discharge Summary.)

Last Name

\_\_\_\_\_  
(e.g. Smith)

Middle Name

\_\_\_\_\_  
(e.g. James. many charts do not list one - not required)

First Name

\_\_\_\_\_  
(e.g. John)

Date of Birth

\_\_\_\_\_  
(MM-DD-YYYY)

Weight in Kilograms

\_\_\_\_\_  
(1 kilogram = 2.2 pounds. Weight in pounds/2.2 = weight in kilograms. Document the pre-op NUMBER ONLY - e.g. 51 kg is documented as 51. This is the patient's ACTUAL weight on ADMISSION. Round to one decimal point: e.g. 75.4. Best location is probably the anesthesia note.)

Height in Centimeters

\_\_\_\_\_  
(1 inch = 2.54 centimeters. 1 foot = 12 inches or 30.48 centimeters. Round to one decimal point and document the NUMBER only: e.g. 175.4 cm is documented as 175.4. To convert meters to cm, move the decimal point two spaces to the right (14.99 meters = 149.9 cm). Best location is probably the anesthesia note.)



Ideal Body Weight (kg)

[\(http://www.mdcalc.com/ideal-body-weight/](http://www.mdcalc.com/ideal-body-weight/)  
Enter gender and height in centimeters -  
calculator will provide IDEAL body weight in kg  
and pounds using the Devine formula (document the  
wt in kg): The Dr. Devine formula: Ideal Body  
Weight (men) = 50kg + 2.3kg \* ( Height(in) - 60 )  
Ideal Body Weight (women) = 45.5kg + 2.3kg \*(  
Height(in) - 60 ) Note: This formula is only an  
approximation, and is generally only applicable  
for people 60 inches (5 foot) tall or greater..  
Round to one decimal point: e.g. 45.4 kg and  
document te NUMBER only: e.g. 74.4 kg is  
documenetd as 74.4)

## BMI (Body Mass Index) Continuous

---

(From chart/medical record.

Round to one decimal point:  
e.g. 25.4.

If not provided in the chart (typically the operative note) the formula is:

English BMI Formula  
BMI

=  
(  
Weight in Pounds  
/  
(  
Height in inches  
x  
Height in inches  
)  
)

x  
703  
Metric BMI Formula  
BMI

=  
(  
Weight in Kilograms  
/  
(  
Height in Meters  
x  
Height in Meters  
)  
)  
).

This

online  
calculator  
can  
also  
be  
used:  
[http://www.nhlbi.nih.gov/health/educational/lose\\_wt/BMI/br](http://www.nhlbi.nih.gov/health/educational/lose_wt/BMI/br)

BMI (Body Mass Index) Categorical

- Underweight: < 18.5
- Normal weight: 18.5 - 24.9
- Overweight: 25 - 29.9
- Obese1: 30 - 34.9
- Obese2: 35 - 39.9
- Morbidly obese: >40  
(Bin based on BMI categorical )

Comments for this instrument and this abstraction

---

# Comorbid Conditions

---



---

## Comorbid Conditions

**(Data source will typically be the Admitting Physician's History & Physical. Some data may be located in the Surgery/Anesthesia Preoperative Note.)**

Alcohol Current

- No
- Yes
- Not addressed/documentated  
(Current includes drinking daily within 4 weeks of this admission. )

Alcohol categorical

- Never drinker
- Past drinker
- Occasional drinker
- Current daily drinker
- Not addressed/documentated  
(Current includes drinking daily. Occasional drinker = social drinker (e.g. "a couple glasses of wine on the weekend"). Never drinker = does not drink at all and no history of drinking. Past drinker = no longer drinks. )

Alcohol withdrawal treatment protocol ordered (e.g. CIWA protocol)

- No
- Yes - CIWA, CIWA-A, or CIWA-Ar protocol ordered or CIWA score documented
- Not addressed/documentated  
(<http://www.mdcalc.com/ciwa-ar-for-alcohol-withdrawal/>. TH

American Society of Anesthesiologists (ASA) class

- I (A normal healthy patient)
- II (A patient with mild systemic disease)
- III (A patient with severe systemic disease)
- IV (A patient with severe systemic disease that is a constant threat to life)
- V (A moribund patient who is not expected to survive without the operation)
- VI (A declared brain-dead patient whose organs are being removed for donor purposes)
- Not addressed/documentated  
(Typically found in the surgery/anesthesia preoperative notes)

Asthma

- No
- Yes
- Not addressed/documentated

Chronic kidney disease (CKD)

- No
- Yes
- Not addressed/documentated  
(includes CKD, CKD class 5, renal disease, renal failure, kidney failure)

Chronic Obstructive Pulmonary Disease (COPD)

- No
- Yes
- Not addressed/documentated  
(Includes COPD, emphysema, chronic bronchitis)

- On Home Oxygen?
- No  
 Yes  
 Not addressed/documentated  
(is patient on oxygen at home?)
- Cardiovascular Disease
- No  
 Yes  
 Not addressed/documentated  
(Includes heart attack, myocardial infarction, STEMI, NSTEMI, angina, dysrhythmia, valve disease (mitral, aortic), cardiomyopathy)
- Dementia
- No  
 Yes  
 Not addressed/documentated  
(Includes: Alzheimer's, senile dementia, dementia. Dementia represents a chronic global loss of cognitive or brain function and phenotypically manifests as the loss of memory, executive function, and attention. It differs from the acute onset of Impaired Sensorium. Dementia in older adults is related to an increased incidence of adverse health care events, including morbidity (pneumonia, febrile episodes, and feeding problems), as well as high 6-month mortality (source: Gajdos et. al, JAMA, 2015).)
- Diabetes - present or absent
- No  
 Yes  
 Not addressed/documentated  
(Includes Diabetes Mellitus, DM, Type I diabetes, Type II diabetes, juvenile onset diabetes )
- Diabetes Oral Controlled
- No  
 Yes  
 Not addressed/documentated  
(type II diabetes, controlled with oral pills)
- Diabetes Insulin Controlled
- No  
 Yes  
 Not addressed/documentated  
(type I diabetes, controlled with insulin injections or pump)
- Dysphagia
- No  
 Yes  
 Not addressed/documentated  
(includes patient reports of dysphagia (difficulty swallowing) POA (present on admission))
- Dyspnea
- No  
 Yes  
 Not addressed/documentated  
(includes patient reports of dyspnea (difficulty breathing) POA)

Functional status

- Independent
- Partially dependent
- Totally dependent
- Not addressed/documented  
(Does the patient perform activities of daily living (ADLs = bathing, eating, etc.) by him/herself (independently), with some assistance (partially dependent), or totally dependent on assistance from family or aides. May be located in social work or nursing notes)

Gastroesophageal Reflux Disease (GERD)

- No
- Yes
- Not addressed/documented

Heart Failure (HF)

- No
- Yes
- Not addressed/documented  
(Includes congestive heart failure, CHF, HFrEF, HFpEF)

Heart Failure New York Heart Association Functional Classification

- Class I symptoms of HF only at levels that would limit normal individuals (asymptomatic)
- Class II symptoms of HF on ordinary exertion
- Class III symptoms of HF on less-than-ordinary exertion
- Class IV symptoms of HF at rest

Heart Failure - Ejection Fraction (HF-EF)

---

(Number is expressed as a percentage - only include the number. E.g. "40%" is entered as 40.)

Hypertension (HTN)

- No
- Yes
- Not addressed/documented  
(HTN, high blood pressure, diastolic hypertension, systolic hypertension)

Impaired Sensorium

- No  
 Yes  
 Not addressed/documentated  
(The American College of Surgeons (ACS) for its NSQIP program defines impaired sensorium is present if the patient is acutely confused and/or delirious and responds to verbal and/or mild tactile stimulation in the context of their current illness. Other descriptors include: disorientation, inattention, agitation, and mental status change. IS occurs within 48 hours prior to the surgical procedure. Patients with long-standing mental changes due to chronic illness (Alzheimer's, chronic mental illness) are not included in "IS", but may be included as having "Dementia" (above). IS may also be a marker of decreased reserve to tolerate the underlying disease process, reflecting a more frail state, which can lead to increased risk of postoperative complications and mortality. (source: Gajdos et. al, JAMA, 2015). This definition of "IS" is similar in definition to "Delirium" but temporally occurs prior to the surgical intervention and hospitalization, rather than after. )

Liver disease

- No  
 Yes  
 Not addressed/documentated  
(includes liver failure, hepatic failure)

Neurologic disease

- No  
 Yes  
 Not addressed/documentated  
(includes disease/deficit: spinal cord injury, paralysis (e.g. following stroke or trauma), stroke, CVA, Parkinson's, Cerebral Palsy), TBI (traumatic brain injury), hypoxic or anoxic brain injury)

Obstructive Sleep Apnea (OSA)

- No  
 Yes  
 Not addressed/documentated

Using a Home CPAP machine?

- No  
 Yes  
 Not addressed/documentated  
(Does the patient use a CPAP machine at home?)

Respiratory infection - recent - within 1 month

- No  
 Yes  
 Not addressed/documentated  
(within the most recent 4 weeks prior to surgery (source: McAlister, 2003, AJRCCM - used 2 weeks, PPC, not-sig))

Sepsis

- No  
 Yes  
 Not addressed/documentated  
(POA, Includes septic shock, SIRS, sepsis, sepsis syndrome)

Smoking Current

- No
- Yes
- Not addressed/documentated  
(smoking info may be located in anesthesia pre-op note)

Smoking categorical

- Never smoker
- Past smoker
- Current smoker
- Not addressed/documentated

Smoking - when quit (number of years since patient quit smoking)

\_\_\_\_\_

Smoking - packs per day (ppd)

\_\_\_\_\_

Smoking - number of years

\_\_\_\_\_

Smoking pack years (ppd x years)

\_\_\_\_\_

Weight loss => 10%

- No
- Yes
- Not addressed/documentated  
(in past three months without trying)

Comments for this instrument and this abstraction

\_\_\_\_\_



## Laboratory and Radiology Tests - Pre-Operative Values

**Lab Values and Chest XRay (pre-operatively - document the results that are closest in time to the actual elective surgery). If the lab was not tested preoperatively, leave the field blank. If there was no pre-op CXR or ECG, check the box for "no pre-op test done". \*\*Note: for all lab tests, document the NUMERICAL value only**

Albumin

(document the numerical value only. E.g. 3.1 g/dL is documented as 3.1. A value of < 3.5g/dL (or 35 g/L) is an indicator of malnutrition.)

BUN

(blood urea nitrogen. In general, 7 to 20 mg/dL (2.5 to 7.1 mmol/L) is considered normal. But normal ranges may vary, depending on the reference range used by the lab, and age.)

Creatinine

(The normal range for creatinine in the blood may be 0.84 to 1.21 milligrams per deciliter (74.3 to 107 micromoles per liter), although this can vary from lab to lab, between men and women, and by age. Since the amount of creatinine in the blood increases with muscle mass, men usually have higher creatinine levels than do women.)

GFR

(GFR= glomerular filtration rate. Test to measure level of kidney function and determine stage of kidney disease. Can calculate it from blood creatinine test, age, body size and gender if not listed in chart. Online calculator: <http://www.mdcalc.com/mdrd-gfr-equation/> If "test not performed", leave blank)

Hemoglobin

(Normal: For men, 13-17 g/dL; for women, 12-15 g/dL. )

Total bilirubin

(Normal results for a total bilirubin test are 1.2 milligrams per deciliter (mg/dL) of total bilirubin for adults)

SpO2 (oxygen saturation)

(oxygen saturation - document the %, numbers only e.g. 98% = 98. Typically found in the surgery/anesthesia preoperative or operative notes. We are interested in room air preoperative SpO2, but realize some patients will be on oxygen preoperatively (see next variable))

SpO2 on room air or oxygen?

Room air  
 Oxygen  
 (Was the SpO2 reading taken On room air? On oxygen? Select one)

Chest XRay (any significant abnormalities?)

- No - no abnormalities documented  
 Yes - yes, abnormalities documented  
 No Pre-Op CXR done  
 (chest xray - any significant abnormal findings yes or no. Significant abnormal findings include: pneumothorax, pneumonia, pulmonary edema, cardiomegaly, ARDS, consolidation, atelectasis, pleural effusion.)

Chest XRay (findings?)

- Pneumothorax  
 Pneumonia  
 Pulmonary edema  
 Cardiomegaly  
 ARDS (adult respiratory distress syndrome)  
 Consolidation  
 Atelectasis  
 Pleural effusion  
 (document the significant findings (radiology note or MD H&P). e.g. cardiomegaly, pulmonary edema, pneumothorax, pneumonia)

Electrocardiogram (any 12-lead ecg abnormalities?)

- No - no abnormalities documented  
 Yes - yes, abnormalities documented  
 No Pre-Op ECG done  
 (any abnormal findings yes or no. Abnormal findings may include cardiac arrhythmias, evidence of old or new myocardial infarction)

Electrocardiogram (findings?)

- ST changes (depression, elevation -STEMI)  
 Bundle branch block  
 Tachycardia (>100 bpm)  
 Bradycardia (< 60 bpm)  
 Ventricular ectopy (PVCs, VTach/VT/ventricular tachycardia, Torsades, VFib/VF/ventricular fibrillation)  
 Atrial disturbance (Afib/atrial fibrillation, Aflutter/atrial flutter)  
 Acute myocardial infarction (AMI) - old  
 (document the findings (MD H&P). e.g. ST elevation, bundle branch block, sinus tachycardia, bradycardia, PVCs, atrial fibrillation)

Comments for this instrument and this abstraction

---

## Laboratory And Radiology Tests - Pre-Diagnosis Values

**Lab and Radiology Values - enter the values for the date closest to the diagnosis date (if a procedure code date is present). For example, if the procedure code is dated 1/27/2012, enter the values for that date or the nearest preceding date for which results are available.**

Procedure/Diagnosis Code Date - present in UHC data file?

- No - diagnosis code only, no date present  
 Yes - procedure code present, with date  
 Yes - procedure code present AND outside of POD 0-5 (There will be a procedure code date for: 9604, 9672, 9671, and 9670. There will be no date for diagnosis codes 51851 and 51853.)

Albumin

(document the numerical value only. E.g. 3.1 g/dL is documented as 3.1. A value of < 3.5g/dL (or 35 g/L) is an indicator of malnutrition.)

BUN

(blood urea nitrogen. In general, 7 to 20 mg/dL (2.5 to 7.1 mmol/L) is considered normal. But normal ranges may vary, depending on the reference range used by the lab, and age.)

Creatinine

(The normal range for creatinine in the blood may be 0.84 to 1.21 milligrams per deciliter (74.3 to 107 micromoles per liter), although this can vary from lab to lab, between men and women, and by age. Since the amount of creatinine in the blood increases with muscle mass, men usually have higher creatinine levels than do women.)

GFR

(GFR= glomerular filtration rate. Test to measure level of kidney function and determine stage of kidney disease. Can calculate it from blood creatinine test, age, body size and gender if not listed in chart. Online calculator: <http://www.mdcalc.com/mdrd-gfr-equation/> If "test not performed", leave blank)

Hemoglobin

(Normal: For men, 13-17 g/dL; for women, 12-15 g/dL. )

Total bilirubin

(Normal results for a total bilirubin test are 1.2 milligrams per deciliter (mg/dL) of total bilirubin for adults)

SpO2 (oxygen saturation)

(oxygen saturation - document the %, numbers only e.g. 98% = 98. Typically found in the surgery/anesthesia preoperative or operative notes. We are interested in room air preoperative SpO2, but realize some patients will be on oxygen preoperatively (see next variable))

SpO2 on room air or oxygen?

- Room air  
 Oxygen  
 (Was the SpO2 reading taken On room air? On oxygen? Select one)

Chest XRay (any significant abnormalities?)

- No - no abnormalities documented  
 Yes - yes, abnormalities documented  
 No Pre-Op CXR done  
 (chest xray - any significant abnormal findings yes or no. Significant abnormal findings include: pneumothorax, pneumonia, pulmonary edema, cardiomegaly, ARDS, consolidation, atelectasis, pleural effusion.)

Chest XRay (findings?)

- Pneumothorax  
 Pneumonia  
 Pulmonary edema  
 Cardiomegaly  
 ARDS (adult respiratory distress syndrome)  
 Consolidation  
 Atelectasis  
 Pleural effusion  
 (document the significant findings (radiology note or MD H&P). e.g. cardiomegaly, pulmonary edema, pneumothorax, pneumonia)

Electrocardiogram (any 12-lead ecg abnormalities?)

- No - no abnormalities documented  
 Yes - yes, abnormalities documented  
 No Pre-Op ECG done  
 (any abnormal findings yes or no. Abnormal findings may include cardiac arrhythmias, evidence of old or new myocardial infarction)

Electrocardiogram (findings?)

- ST changes (depression, elevation -STEMI)  
 Bundle branch block  
 Tachycardia (>100 bpm)  
 Bradycardia (< 60 bpm)  
 Ventricular ectopy (PVCs, VTach/VT/ventricular tachycardia, Torsades, VFib/VF/ventricular fibrillation)  
 Atrial disturbance (Afib/atrial fibrillation, Aflutter/atrial flutter)  
 Acute myocardial infarction (AMI) - old  
 (document the findings (MD H&P). e.g. ST elevation, bundle branch block, sinus tachycardia, bradycardia, PVCs, atrial fibrillation)

Comments for this instrument and this abstraction

---

# Operative Procedural Factors

---



---

## Operative Procedural Factors

**(Data are typically found in the Surgery/Anesthesia Documentation) \*\*\*NOTE: only document the NUMBER ONLY, not any associated measurement scale, commas, etc.. For example: 300 cc is documented as 300; 3,600 cc is documented as 3600; 70 mmHg is documented as 70; 65 bpm is documented as 65; 98% is documented as 98. All times are MILITARY.**

Anesthesia type

- Local or Regional (e.g. epidural)  
 Conscious sedation  
 General  
 (Local or Regional, Conscious sedation, General (or GA). Most will be general)

Neuromuscular Blocker (NMB) Used?

- No  
 Yes  
 (Yes if Succinylcholine (Anectine), Rocuronium (Zemuron), Vecuronium (Norcuron), Atracurium (Tracrium), Cisatracurium (Nimbex), Pancuronium (Pavulon), etc.)

NMB used - type

- None  
 Succinylcholine  
 Atracurium  
 Vecuronium  
 Rocuronium  
 Cisatracurium  
 Pancuronium  
 Other  
 (Succinylcholine (Anectine), Rocuronium (Zemuron), Vecuronium (Norcuron), Atracurium (Tracrium), Cisatracurium (Nimbex), Pancuronium (Pavulon))

NMB Used - Other

\_\_\_\_\_

(type exactly as it appears in the anesthesia/physician note)

Surgery date

\_\_\_\_\_

(MM-DD-YYYY for all dates)

Anesthesia start time

\_\_\_\_\_

(The time anesthesia care started. All times are entered using military time, no colon, dash, or space (e.g. 08:15 a.m. is documented as 0815))

Airway start time

\_\_\_\_\_

(Airway insertion or intubation time)

Airway placement location

- Operating room  
 Pre-Op or PACU (e.g. during perioperative time, but not in OR)  
 Preoperatively (e.g. ICU, Ward)  
 (Where was the airway placed?)

Surgery start time

\_\_\_\_\_

(skin incision time)



|                                                      |                                                                                                                                                                                                                                                                                                                                                                                  |
|------------------------------------------------------|----------------------------------------------------------------------------------------------------------------------------------------------------------------------------------------------------------------------------------------------------------------------------------------------------------------------------------------------------------------------------------|
| Intraoperative transfusion (blood)                   | <hr/><br>(the amount of blood products documented in the anesthesia or surgeon record, document in ccs (e.g. 300 cc is documented as 300). Inclusive of all blood products: RBCs, whole blood, platelets, fresh frozen plasma (FFP))                                                                                                                                             |
| Intraoperative crystalloid                           | <hr/><br>(the amount of crystalloid documented in the anesthesia or surgeon record, document in ccs (e.g. 3000 cc is documented as 3000). Includes: normal saline, NS, 0.9% saline, hypertonic (3%) saline, lactated ringers, ringers lactate, LR. Dextrose solutions (D5W) are not used for fluid replacement/blood loss, but should be included in the total surgical volume.) |
| Intraoperative colloid                               | <hr/><br>(the amount of colloid documented in the anesthesia or surgeon record, document in ccs (e.g. 300 cc is documented as 300). Includes: Albumin, Hetastarch)                                                                                                                                                                                                               |
| Intraoperative tidal volume total cc - lowest        | <hr/><br>(The lowest volume of gas delivered to the patient. Typically recorded directly in flowchart as total volume. Round to nearest whole number - $450.6 = 451$ cc and is documented as 451)                                                                                                                                                                                |
| Intraoperative tidal volume cc - highest             | <hr/><br>(The highest volume of gas delivered to the patient. Typically recorded directly in the flowchart. Round to nearest whole number - $556.7 = 557$ cc. and is documented as 557)                                                                                                                                                                                          |
| Intraoperative ventilator respiratory rate - lowest  | <hr/><br>(Document the lowest respiratory rate (RR) the ventilator was set for in the operating room.)                                                                                                                                                                                                                                                                           |
| Intraoperative ventilator respiratory rate - highest | <hr/><br>(Document the highest respiratory rate (RR) the ventilator was set for in the operating room.)                                                                                                                                                                                                                                                                          |
| Intraoperative FiO2 - lowest                         | <hr/><br>(FiO2 = fraction of inspired oxygen. 0.5 FiO2 = 50%. Record the lowest FiO2 during the surgical procedure. This value may be .21, which equals room air.)                                                                                                                                                                                                               |
| Intraoperative FiO2 - highest                        | <hr/><br>(FiO2 = fraction of inspired oxygen. 0.5 FiO2 = 50%. Record the highest FiO2 during the surgical procedure. This value may be 1.0, which equals 100% oxygen.)                                                                                                                                                                                                           |
| Intraoperative PEEP - lowest                         | <hr/><br>(PEEP = positive end-expiratory pressure. The pressure maintained in the patient's airway during expiration/exhalation. Record the lowest PEEP setting during the operative procedure. This value may be 0, although a PEEP of 3-5 cmH2O is considered physiologic. Record the numbers only.)                                                                           |

Intraoperative PEEP - highest

(PEEP = positive end-expiratory pressure. The pressure maintained in the patient's airway during expiration/exhalation. Record the highest PEEP setting during the operative procedure. Examples include: 5, 8, 12, etc.)

Intraoperative PIP - lowest

(PIP = peak inspiratory pressure. The maximum pressure delivered to the patient during inspiration/inhalation. Record the lowest PIP setting during the operative procedure. A normal low value may be 16 cmH2O. Record the numbers only.)

Intraoperative PIP - highest

(PIP = peak inspiratory pressure. The maximum pressure delivered to the patient during inspiration/inhalation. Record the highest PIP setting during the operative procedure. A normal high value may be 29. Document the numbers only)

Intraoperative analgesia 1 name

(Includes: Fentanyl (Sublimaze), Hydromorphone (Dilaudid), Alfentanil (Alfenta), Sufentanil (Sufenta), Meperidine (Demerol), Morphine sulfate (Morphine). Record the name of the first analgesic given. E.g. fentanyl. )

Intraoperative analgesia 1 dose

(Record the dose of the first analgesia given, do NOT include the measurement scale. E.g. 100 mcg is documented as 100)

Intraoperative analgesia 1 scale

mcg  
 mg  
(Record the measurement scale of the first analgesia given)

Intraoperative analgesia 2 name

(Includes: Fentanyl (Sublimaze), Hydromorphone (Dilaudid), Alfentanil (Alfenta), Sufentanil (Sufenta), Meperidine (Demerol), Morphine sulfate (Morphine). Record the name of the second analgesic given. E.g. dilaudid.)

Intraoperative analgesia 2 dose

(Record the dose of the second analgesia given, do NOT include the measurement scale. E.g. 2 mg is documented as 2. )

Intraoperative analgesia 2 scale

mcg  
 mg  
(Record the measurement scale of the second analgesia given)



Intraoperative morphine equivalent units (in mg)

(<http://clinicalcalc.com/Opioids/> **\*\*Using the online calculator, calculate the total "morphine equivalent units" (morphine equianalgesic dose) of all opioids given in the operating room combined. Example: fentanyl 100 mcg = equianalgesic dose of morphine 8 mg PLUS hydromorphone 1mg = equianalgesic dose of morphine 3 mg. TOTAL equianalgesic dose of morphine = 8 mg +3 mg =11 mg. So you will enter "11" in this text box (given this example). Note: Equianalgesic conversions used in this calculator are based on the American Pain Society guidelines and critical review papers regarding equianalgesic dosing. There is an overall lack of data regarding most equianalgesic conversions, and there is a significant degree of interpatient variability. This calculation is not being used to guide treatment but, rather, to analyze total opioid dose in a standardized manner.)**

Non-narcotic pain medication

- No  
 Yes  
 (Select "yes" is any non-narcotic analgesic medications were given in the operating room: e.g. IV tylenol/acetaminophen, IV Toradol/ketorolac)

Intraoperative sedation 1 name

(Includes: Benzodiazepines such as Lorazepam (Ativan), Diazepam (Valium), Midazolam (Versed). Record the name of the first benzo sedative given. E.g. Midazolam. )

Intraoperative sedation 1 dose

(Record the dose of the first benzo sedative given. E.g. 2 mg is documented as 2. )

Intraoperative sedation 1 scale

- mcg  
 mg  
 (Record the measurement scale of the first benzo sedative given. )

Intraoperative sedation 2 name

(Includes: Benzodiazepines such as Lorazepam (Ativan), Diazepam (Valium), Midazolam (Versed). Record the name of the second benzo sedative given. E.g. diazepam. )

Intraoperative sedation 2 dose

(Record the dose of the second benzo sedative given. E.g. 5 mg is documented as 5)

Intraoperative sedation 2 scale

- mcg  
 mg  
 (Record the measurement scale of the second benzo sedative given. )

Intraoperative benzodiazepine equivalent units

(<http://clincalc.com/benzodiazepine/> \*\* Using the online calculator, calculate the total "diazepam equivalent units" (approximate benzodiazepine dosing conversion) of all benzodiazepines given in the operating room combined. Example: lorazepam 2 mg = diazepam equivalent dose of 10 mg PLUS midazolam 2mg = diazepam equivalent dose of 5 mg. TOTAL diazepam equivalent dose = 10 mg +5 mg =15 mg. So you will enter "15" in this text box (given this example). Note: This conversion tool estimates a reasonable equipotent dose between two benzodiazepines. Unlike opioid equipotent dosing, benzodiazepine equivalence is much less evidence-based and poorly described in the literature. In fact, most benzodiazepine equivalence estimates are based on expert opinion, uncited tables in published documents, and clinical practice. This calculation is not being used to guide treatment but, rather, to analyze total benzodiazepine dose in a standardized manner.)

Extubation (airway removal) location

- Operating Room  
 PACU  
 Medical ICU  
 Surgical ICU  
 Med/Surg ICU  
 Ward  
 Other

(Typically will be the Operating Room, but could be the PACU or the ICU. Select the correct location from the list.)

Extubation Location - Other

(type exactly as the location appears in the physician note)

Extubation (airway removal) date

(The date the airway was removed: either the day of surgery (if removed in the OR) or a later date)

Intraoperative fluid intake

(gross cc for the OR time, as documented in anesthesia note. NUMBERS only, in cc)

Intraoperative fluid output

(gross cc for the OR time, as documented in anesthesia note. NUMBERS only, in cc)

Intraoperative net fluid

(gross cc for the OR time, as documented in anesthesia note. May be a positive or negative number: If more fluid in than out = positive; if more fluid out than in = negative. NUMBERS only, in ccs; include the "-" sign for negative numbers. Do NOT include the "+" sign for positive values.)

Total 24 hour fluid intake

(gross cc per first 24 hours post-op, as documented in anesthesia or surgeon's note. NUMBERS only, in ccs)

Total 24 hour fluid output

---

  
(gross cc per first 24 hours post-op, as documented in anesthesia or surgeon's note. NUMBERS only, in ccs)

Total 24 hour net fluid

---

  
(gross cc per first 24 hours post-op, as documented in anesthesia or surgeon's note. May be a positive or negative number: If more fluid in than out = positive; if more fluid out than in = negative. NUMBERS only, in ccs. If the number is negative, include the "-" sign. Example: 3,000cc in and 1,500 cc out = 1500)

Comments for this instrument and this abstraction

---

# Nursing Sensitive Structure - Hospital-Level and Unit-Level

---



---

## Hospital-Level and Unit-Level Structural Data.

**Much of these data will likely remain the same for each site for the duration of the study (at the hospital-level). Exceptions will include Magnet status received during study period, % certification/degree increase/decrease year-over-year. Enter data for the calendar year during which the patient was admitted. For the Unit-Level data, there will be no data for certain years. If this is the case, leave the field blank and enter a comment in the last box. \*Data for each site will be found in the REDCap File Respiratory - look for the xls file that corresponds to the site you are entering data for.**

Magnet hospital

- Yes  
 No  
 (Obtain these from Nursing Admin or Magnet Coordinator)

Number of licensed beds

\_\_\_\_\_ (Obtain these from Nursing Admin or Magnet Coordinator)

Hospital - Nursing care hours per patient day (for the entire hospital)

\_\_\_\_\_ (Obtain these from Nursing Admin or Magnet Coordinator)

Staffing (type)

- All RN  
 RN and LVN  
 RN and LVN and CNA  
 RN and CNA  
 Other  
 (Obtain these from Nursing Admin or Magnet Coordinator)

Staffing Type - Other

\_\_\_\_\_

Hospital - Percentage of nurses with Bachelors degree or higher (for the entire hospital)

\_\_\_\_\_ (Obtain these from Nursing Admin or Magnet Coordinator. Enter the NUMBER only)

Hospital - Percentage of nurses with professional specialty certification (for the entire hospital)

\_\_\_\_\_ (Obtain these from Nursing Admin or Magnet Coordinator. Enter the NUMBER only)

CALNOC member

- Yes  
 No  
 (Obtain these from Nursing Admin or Magnet Coordinator)

NDNQI member

- Yes  
 No  
 (Obtain these from Nursing Admin or Magnet Coordinator)

UHC NQDB member

- Yes
  - No
- (Obtain these from Nursing Admin or Magnet Coordinator)

Nursing Unit Name

\_\_\_\_\_

(Record what the unit is known as or referred to. E.g. Medical ICU, Trauma ICU, D11 Ortho, D6 cardiac stepdown.)

Nursing Unit Type

- Medical ICU (e.g. general, respiratory, cardiac)
  - Surgical ICU (e.g. general, trauma, neuro)
  - Med/Surg Combined ICU
  - Step Down or Telemetry Unit
  - Ward - Surgical
  - Ward - Medical
  - Ward - Mixed Medical and Surgical
  - Other
- (Select from the dropdown list)

Nursing Unit Type - Other

\_\_\_\_\_

Nursing Unit - Nursing Care Hours Per Patient Day

\_\_\_\_\_

Nursing Unit - Percent of Nurses with Professional Certification

\_\_\_\_\_

(Magnet-recognized only: RN-C, CCRN, etc. (obtain from Magnet Coordinator). Enter the NUMBER only)

Nursing Unit - Percent of Nurses with Bachelor's Degree or Higher

\_\_\_\_\_

(Magnet-recognized only: BSN, MSN, PhD, etc. (obtain from Magnet Coordinator). Enter the NUMBER only)

Comments for this instrument and this abstraction

\_\_\_\_\_

# Nursing Sensitive Process Overall - Post-Operative Days 0-5

## Nursing Sensitive Process Measures (immediate post-operative period - days 0-5 = POD 0-5) - Patient-Level Data \*Ward or ICU

Lung expansion exercises (by POD 1)

- Not addressed/documentated
  - Incentive spirometry
  - Coughing/Deep breathing
  - Other Pulmonary hygiene
- (Record if documented by Post Op Day (POD) 1 (the day after the surgical procedure). This is a multipick variable - so select all that apply. This will typically be located in the nursing flowsheets.)

Mobility category (by POD 1)

- Not addressed/documentated
  - Range of motion (ROM) active or passive in bed
  - Sits up in bed
  - Sits on side of bed and dangles legs
  - Stands at bedside
  - Transfers to Chair (from bed with or without assist)
  - Ambulates (from bed or chair with assist)
  - Independent (e.g. ambulates without assist)
  - Medical Contraindication per MD order
- (What level of mobility is the patient receiving by POD 1? Assistance may be from nursing, nursing aid, physical therapy, etc. Check all that apply and are documented by POD 1.)

Oral Care (by POD 1)

- Not addressed/documentated
  - Oral care (includes toothbrushing)
  - Chlorhexidine gluconate (CHG)
  - Medical Contraindication per MD order
- (Documentation of oral care performed by the RN (ICU) or the patient (Ward) by POD 1? This includes toothbrushing, chlorhexidine (CHG) oral care kit, or other oral care kit. This will typically be located in the nursing flowsheets.)

Agitation assessment (by POD 1)

- Not addressed/documentated
  - Richmond Agitation Sedation Scale (RASS)
  - Sedation Agitation Scale (SAS)
  - Other Agitation Scale documented
- (Does the patient have a documented RASS or SAS score by POD 1?)

Delirium assessment (by POD 1)

- Not addressed/documentated
  - Confusion Assessment Method for Wards (CAM)
  - Confusion Assessment Method for ICU (CAM-ICU)
  - Intensive Care Delirium Screening Checklist (ICDSC)
  - Other Delirium Scale Documented
- (Does the patient have a documented CAM, CAM-ICU, or ICDSC Score by POD1?)

---



---

**Postoperative Analgesia and Sedation**

Analgesia POD 0

- None
  - PCA - opioid basal (continuous) dose
  - PCA - opioid demand dose with lockout interval
  - Epidural infusion - local anesthetics (e.g. lidocaine, bupivacaine)
  - Epidural infusion -opioids
  - Epidural PCEA - local anesthetic(s)
  - Epidural PCEA - opioids
  - Opioid IV (e.g. fentanyl, remifentanyl, morphine, hydromorphone) - continuous Infusion
  - Opioid IV bolus dose prn
  - Opioid Intramuscular
  - Opioid Subcutaneous
  - Opioid Transdermal
  - Opioid Oral (e.g. codeine, oxycodone, hydromorphone)
  - Local block
  - Regional block
  - IV Acetaminophen
  - Oral Acetaminophen (with or without opioid)
  - IV NSAIDs (e.g. ketorolac, ibuprofen, diclofenac)
  - Oral NSAIDs
  - Anticonvulsants (e.g. gabapentin, pregabalin)
  - Methadone
  - Other
- (multi-pick - select all modes of pain medication in place on this POD)

Analgesia POD 1

- None
  - PCA - opioid basal (continuous) dose
  - PCA - opioid demand dose with lockout interval
  - Epidural infusion - local anesthetics (e.g. lidocaine, bupivacaine)
  - Epidural infusion -opioids
  - Epidural PCEA - local anesthetic(s)
  - Epidural PCEA - opioids
  - Opioid IV (e.g. fentanyl, remifentanyl, morphine, hydromorphone) - continuous Infusion
  - Opioid IV bolus dose prn
  - Opioid Intramuscular
  - Opioid Subcutaneous
  - Opioid Transdermal
  - Opioid Oral (e.g. codeine, oxycodone, hydromorphone)
  - Local block
  - Regional block
  - IV Acetaminophen
  - Oral Acetaminophen (with or without opioid)
  - IV NSAIDs (e.g. ketorolac, ibuprofen, diclofenac)
  - Oral NSAIDs
  - Anticonvulsants (e.g. gabapentin, pregabalin)
  - Methadone
  - Other
  - N/A - patient discharged on prior day
- (multi-pick - select all modes of pain medication in place on this POD)

## Analgesia POD 2

- None
- PCA - opioid basal (continuous) dose
- PCA - opioid demand dose with lockout interval
- Epidural infusion - local anesthetics (e.g. lidocaine, bupivacaine)
- Epidural infusion -opioids
- Epidural PCEA - local anesthetic(s)
- Epidural PCEA - opioids
- Opioid IV (e.g. fentanyl, remifentanyl, morphine, hydromorphone) - continuous Infusion
- Opioid IV bolus dose prn
- Opioid Intramuscular
- Opioid Subcutaneous
- Opioid Transdermal
- Opioid Oral (e.g. codeine, oxycodone, hydromorphone)
- Local block
- Regional block
- IV Acetaminophen
- Oral Acetaminophen (with or without opioid)
- IV NSAIDs (e.g. ketorolac, ibuprofen, diclofenac)
- Oral NSAIDs
- Anticonvulsants (e.g. gabapentin, pregabalin)
- Methadone
- Other
- N/A - patient discharged on prior day  
(multi-pick - select all modes of pain medication in place on this POD)

## Analgesia POD 3

- None
- PCA - opioid basal (continuous) dose
- PCA - opioid demand dose with lockout interval
- Epidural infusion - local anesthetics (e.g. lidocaine, bupivacaine)
- Epidural infusion -opioids
- Epidural PCEA - local anesthetic(s)
- Epidural PCEA - opioids
- Opioid IV (e.g. fentanyl, remifentanyl, morphine, hydromorphone) - continuous Infusion
- Opioid IV bolus dose prn
- Opioid Intramuscular
- Opioid Subcutaneous
- Opioid Transdermal
- Opioid Oral (e.g. codeine, oxycodone, hydromorphone)
- Local block
- Regional block
- IV Acetaminophen
- Oral Acetaminophen (with or without opioid)
- IV NSAIDs (e.g. ketorolac, ibuprofen, diclofenac)
- Oral NSAIDs
- Anticonvulsants (e.g. gabapentin, pregabalin)
- Methadone
- Other
- N/A - patient discharged on prior day  
(multi-pick - select all modes of pain medication in place on this POD)



## Analgesia POD 4

- None
- PCA - opioid basal (continuous) dose
- PCA - opioid demand dose with lockout interval
- Epidural infusion - local anesthetics (e.g. lidocaine, bupivacaine)
- Epidural infusion -opioids
- Epidural PCEA - local anesthetic(s)
- Epidural PCEA - opioids
- Opioid IV (e.g. fentanyl, remifentanyl, morphine, hydromorphone) - continuous Infusion
- Opioid IV bolus dose prn
- Opioid Intramuscular
- Opioid Subcutaneous
- Opioid Transdermal
- Opioid Oral (e.g. codeine, oxycodone, hydromorphone)
- Local block
- Regional block
- IV Acetaminophen
- Oral Acetaminophen (with or without opioid)
- IV NSAIDs (e.g. ketorolac, ibuprofen, diclofenac)
- Oral NSAIDs
- Anticonvulsants (e.g. gabapentin, pregabalin)
- Methadone
- Other
- N/A - patient discharged on prior day  
(multi-pick - select all modes of pain medication in place on this POD)

## Analgesia POD 5

- None
- PCA - opioid basal (continuous) dose
- PCA - opioid demand dose with lockout interval
- Epidural infusion - local anesthetics (e.g. lidocaine, bupivacaine)
- Epidural infusion -opioids
- Epidural PCEA - local anesthetic(s)
- Epidural PCEA - opioids
- Opioid IV (e.g. fentanyl, remifentanyl, morphine, hydromorphone) - continuous Infusion
- Opioid IV bolus dose prn
- Opioid Intramuscular
- Opioid Subcutaneous
- Opioid Transdermal
- Opioid Oral (e.g. codeine, oxycodone, hydromorphone)
- Local block
- Regional block
- IV Acetaminophen
- Oral Acetaminophen (with or without opioid)
- IV NSAIDs (e.g. ketorolac, ibuprofen, diclofenac)
- Oral NSAIDs
- Anticonvulsants (e.g. gabapentin, pregabalin)
- Methadone
- Other
- N/A - patient discharged on prior day  
(multi-pick - select all modes of pain medication in place on this POD)

Sedation POD 0

- None
  - Benzodiazepine (e.g. diazepam, midazolam, lorazepam) - continuous infusion
  - Benzodiazepine (e.g. diazepam, midazolam, lorazepam) - IV bolus prn
  - Propofol infusion
  - Dexmedetomidine infusion
  - Other
- (multi-pick, select all that were in place on this POD)

Sedation POD 1

- None
  - Benzodiazepine (e.g. diazepam, midazolam, lorazepam) - continuous infusion
  - Benzodiazepine (e.g. diazepam, midazolam, lorazepam) - IV bolus prn
  - Propofol infusion
  - Dexmedetomidine infusion
  - Other
  - N/A - patient discharged on prior day
- (multi-pick, select all that were in place on this POD)

Sedation POD 2

- None
  - Benzodiazepine (e.g. diazepam, midazolam, lorazepam) - continuous infusion
  - Benzodiazepine (e.g. diazepam, midazolam, lorazepam) - IV bolus prn
  - Propofol infusion
  - Dexmedetomidine infusion
  - Other
  - N/A - patient discharged on prior day
- (multi-pick, select all that were in place on this POD)

Sedation POD 3

- None
  - Benzodiazepine (e.g. diazepam, midazolam, lorazepam) - continuous infusion
  - Benzodiazepine (e.g. diazepam, midazolam, lorazepam) - IV bolus prn
  - Propofol infusion
  - Dexmedetomidine infusion
  - Other
  - N/A - patient discharged on prior day
- (multi-pick, select all that were in place on this POD)

Sedation POD 4

- None
  - Benzodiazepine (e.g. diazepam, midazolam, lorazepam) - continuous infusion
  - Benzodiazepine (e.g. diazepam, midazolam, lorazepam) - IV bolus prn
  - Propofol infusion
  - Dexmedetomidine infusion
  - Other
  - N/A - patient discharged on prior day
- (multi-pick, select all that were in place on this POD)

Sedation POD 5

- None  
 Benzodiazepine (e.g. diazepam, midazolam, lorazepam) - continuous infusion  
 Benzodiazepine (e.g. diazepam, midazolam, lorazepam) - IV bolus prn  
 Propofol infusion  
 Dexmedetomidine infusion  
 Other  
 N/A - patient discharged on prior day (multi-pick, select all that were in place on this POD)

---

## Hospital Acquired Complications

Venous thromboembolism (VTE) during hospitalization? (includes deep vein thrombosis [DVT] and pulmonary embolism [PE])

- No  
 Yes  
 Not addressed/documented  
 (Is there documentation of this complication during this admission (in the MD progress notes - most likely in the Discharge Summary))

Ventilator Associated Pneumonia (VAP) (includes ventilator associated event [VAE] continuum)

- No  
 Yes  
 Not addressed/documented  
 (Is there documentation of this complication during this admission (in the MD progress notes - most likely in the Discharge Summary))

Catheter Associated Urinary Track Infection (CAUTI)

- No  
 Yes  
 Not addressed/documented  
 (Is there documentation of this complication during this admission (in the MD progress notes - most likely in the Discharge Summary). \*\*\*CAUTI, CLABSI, and SSI presence and dates are most readily found in the UHC/Vizient xls file ~columns ADR-ADX for cases and AJH-AJN for controls.)

Central Line Associated Blood Stream Infection (CLABSI)

- No  
 Yes  
 Not addressed/documented  
 (Is there documentation of this complication during this admission (in the MD progress notes - most likely in the Discharge Summary) \*\*\*CAUTI, CLABSI, and SSI presence and dates are most readily found in the UHC/Vizient xls file ~columns ADR-ADX for cases and AJH-AJN for controls.)

Surgical Site Infection (SSI)

- No  
 Yes  
 Not addressed/documented  
 (Is there documentation of this complication during this admission (in the MD progress notes - most likely in the Discharge Summary). \*\*\*CAUTI, CLABSI, and SSI presence and dates are most readily found in the UHC/Vizient xls file ~columns ADR-ADX for cases and AJH-AJN for controls.)

Comments for this instrument and this abstraction

---

(\*\*Include comments for "other" analgesia and "other" sedation)

# Nursing Sensitive Process Overall - Pre-Diagnosis Days 0-5

**These data fields are ONLY collected if the patient: 1) has a procedure diagnosis code date AND 2) the procedure code is NOT dated within the first 5 PODs.**

Procedure/Diagnosis Code Date - present in UHC data file AND occurs outside of POD 0-5?

- No - diagnosis code only, no date present  
 Yes - procedure code present, with date  
 Yes - procedure code present AND outside of POD 0-5 (There will be a procedure code date for: 9604, 9672, 9671, and 9670. There will be no date for diagnosis codes 51851 and 51853.)

**Pre-Diagnosis Analgesia and Sedation: pre-diagnosis day 0 = date of diagnosis; pre-diagnosis day 1 = day before diagnosis, etc. Data are collected for days 0-5 pre-diagnosis. \*\*Note: only collect data for the dates that DO NOT overlap with POD 0-5. For example, if POD 5 is the same day as Pre-Diagnosis day 3, only collect the data for this day in the POD instrument. Make a note in the comments of the overlap - e.g. "Pre Dx day 3 = POD 5"**

Analgesia Pre-Diagnosis 0 (the day of the diagnosis)

- None  
 PCA - opioid basal (continuous) dose  
 PCA - opioid demand dose with lockout interval  
 Epidural infusion - local anesthetics (e.g. lidocaine, bupivacaine)  
 Epidural infusion - opioids  
 Epidural PCEA - local anesthetic(s)  
 Epidural PCEA - opioids  
 Opioid IV (e.g. fentanyl, remifentanyl, morphine, hydromorphone) - continuous Infusion  
 Opioid IV bolus dose prn  
 Opioid Intramuscular  
 Opioid Subcutaneous  
 Opioid Transdermal  
 Opioid Oral (e.g. codeine, oxycodone, hydromorphone)  
 Local block  
 Regional block  
 IV Acetaminophen  
 Oral Acetaminophen (with or without opioid)  
 IV NSAIDs (e.g. ketorolac, ibuprofen, diclofenac)  
 Oral NSAIDs  
 Anticonvulsants (e.g. gabapentin, pregabalin)  
 Methadone  
 Other  
 (multi-pick - select all modes of pain medication in place on this day)

Analgesia Pre-Diagnosis Day 1 (the day before the diagnosis)

- None
  - PCA - opioid basal (continuous) dose
  - PCA - opioid demand dose with lockout interval
  - Epidural infusion - local anesthetics (e.g. lidocaine, bupivacaine)
  - Epidural infusion -opioids
  - Epidural PCEA - local anesthetic(s)
  - Epidural PCEA - opioids
  - Opioid IV (e.g. fentanyl, remifentanyl, morphine, hydromorphone) - continuous Infusion
  - Opioid IV bolus dose prn
  - Opioid Intramuscular
  - Opioid Subcutaneous
  - Opioid Transdermal
  - Opioid Oral (e.g. codeine, oxycodone, hydromorphone)
  - Local block
  - Regional block
  - IV Acetaminophen
  - Oral Acetaminophen (with or without opioid)
  - IV NSAIDs (e.g. ketorolac, ibuprofen, diclofenac)
  - Oral NSAIDs
  - Anticonvulsants (e.g. gabapentin, pregabalin)
  - Methadone
  - Other
  - N/A - patient discharged on prior day
  - N/A - patient day overlaps with a pre-operative day (and data have already been entered)
- (multi-pick - select all modes of pain medication in place on this day)

Analgesia Pre-Diagnosis Day 2 (2 days before the diagnosis)

- None
  - PCA - opioid basal (continuous) dose
  - PCA - opioid demand dose with lockout interval
  - Epidural infusion - local anesthetics (e.g. lidocaine, bupivacaine)
  - Epidural infusion -opioids
  - Epidural PCEA - local anesthetic(s)
  - Epidural PCEA - opioids
  - Opioid IV (e.g. fentanyl, remifentanyl, morphine, hydromorphone) - continuous Infusion
  - Opioid IV bolus dose prn
  - Opioid Intramuscular
  - Opioid Subcutaneous
  - Opioid Transdermal
  - Opioid Oral (e.g. codeine, oxycodone, hydromorphone)
  - Local block
  - Regional block
  - IV Acetaminophen
  - Oral Acetaminophen (with or without opioid)
  - IV NSAIDs (e.g. ketorolac, ibuprofen, diclofenac)
  - Oral NSAIDs
  - Anticonvulsants (e.g. gabapentin, pregabalin)
  - Methadone
  - Other
  - N/A - patient discharged on prior day
  - N/A - patient day overlaps with a pre-operative day (and data have already been entered)
- (multi-pick - select all modes of pain medication in place on this day)

Analgesia Pre-Diagnosis Day 3 (3 days before the diagnosis)

- None
  - PCA - opioid basal (continuous) dose
  - PCA - opioid demand dose with lockout interval
  - Epidural infusion - local anesthetics (e.g. lidocaine, bupivacaine)
  - Epidural infusion -opioids
  - Epidural PCEA - local anesthetic(s)
  - Epidural PCEA - opioids
  - Opioid IV (e.g. fentanyl, remifentanyl, morphine, hydromorphone) - continuous Infusion
  - Opioid IV bolus dose prn
  - Opioid Intramuscular
  - Opioid Subcutaneous
  - Opioid Transdermal
  - Opioid Oral (e.g. codeine, oxycodone, hydromorphone)
  - Local block
  - Regional block
  - IV Acetaminophen
  - Oral Acetaminophen (with or without opioid)
  - IV NSAIDs (e.g. ketorolac, ibuprofen, diclofenac)
  - Oral NSAIDs
  - Anticonvulsants (e.g. gabapentin, pregabalin)
  - Methadone
  - Other
  - N/A - patient discharged on prior day
  - N/A - patient day overlaps with a pre-operative day (and data have already been entered)
- (multi-pick - select all modes of pain medication in place on this day)

Analgesia Pre-Diagnosis Day 4 (4 days before the diagnosis)

- None
  - PCA - opioid basal (continuous) dose
  - PCA - opioid demand dose with lockout interval
  - Epidural infusion - local anesthetics (e.g. lidocaine, bupivacaine)
  - Epidural infusion -opioids
  - Epidural PCEA - local anesthetic(s)
  - Epidural PCEA - opioids
  - Opioid IV (e.g. fentanyl, remifentanyl, morphine, hydromorphone) - continuous Infusion
  - Opioid IV bolus dose prn
  - Opioid Intramuscular
  - Opioid Subcutaneous
  - Opioid Transdermal
  - Opioid Oral (e.g. codeine, oxycodone, hydromorphone)
  - Local block
  - Regional block
  - IV Acetaminophen
  - Oral Acetaminophen (with or without opioid)
  - IV NSAIDs (e.g. ketorolac, ibuprofen, diclofenac)
  - Oral NSAIDs
  - Anticonvulsants (e.g. gabapentin, pregabalin)
  - Methadone
  - Other
  - N/A - patient discharged on prior day
  - N/A - patient day overlaps with a pre-operative day (and data have already been entered)
- (multi-pick - select all modes of pain medication in place on this day)

Analgesia Pre-Diagnosis Day 5 (5 days before the diagnosis)

- None
  - PCA - opioid basal (continuous) dose
  - PCA - opioid demand dose with lockout interval
  - Epidural infusion - local anesthetics (e.g. lidocaine, bupivacaine)
  - Epidural infusion -opioids
  - Epidural PCEA - local anesthetic(s)
  - Epidural PCEA - opioids
  - Opioid IV (e.g. fentanyl, remifentanyl, morphine, hydromorphone) - continuous Infusion
  - Opioid IV bolus dose prn
  - Opioid Intramuscular
  - Opioid Subcutaneous
  - Opioid Transdermal
  - Opioid Oral (e.g. codeine, oxycodone, hydromorphone)
  - Local block
  - Regional block
  - IV Acetaminophen
  - Oral Acetaminophen (with or without opioid)
  - IV NSAIDs (e.g. ketorolac, ibuprofen, diclofenac)
  - Oral NSAIDs
  - Anticonvulsants (e.g. gabapentin, pregabalin)
  - Methadone
  - Other
  - N/A - patient discharged on prior day
  - N/A - patient day overlaps with a pre-operative day (and data have already been entered)
- (multi-pick - select all modes of pain medication in place on this day)

Sedation Pre-Diagnosis Day 0 (the day of the diagnosis)

- None
  - Benzodiazepine (e.g. diazepam, midazolam, lorazepam) - continuous infusion
  - Benzodiazepine (e.g. diazepam, midazolam, lorazepam) - IV bolus prn
  - Propofol infusion
  - Dexmedetomidine infusion
  - Other
- (multi-pick, select all that were in place on this day)

Sedation Pre-Diagnosis Day 1 (1 day before the diagnosis)

- None
  - Benzodiazepine (e.g. diazepam, midazolam, lorazepam) - continuous infusion
  - Benzodiazepine (e.g. diazepam, midazolam, lorazepam) - IV bolus prn
  - Propofol infusion
  - Dexmedetomidine infusion
  - Other
  - N/A - patient discharged on prior day
  - N/A - patient day overlaps with a pre-operative day (and data have already been entered)
- (multi-pick, select all that were in place on this day)



Sedation Pre-Diagnosis Day 2 (2 days before the diagnosis)

- None
- Benzodiazepine (e.g. diazepam, midazolam, lorazepam) - continuous infusion
- Benzodiazepine (e.g. diazepam, midazolam, lorazepam) - IV bolus prn
- Propofol infusion
- Dexmedetomidine infusion
- Other
- N/A - patient discharged on prior day
- N/A - patient day overlaps with a pre-operative day (and data have already been entered)  
(multi-pick, select all that were in place on this day)

Sedation Pre-Diagnosis Day 3 (3 days before the diagnosis)

- None
- Benzodiazepine (e.g. diazepam, midazolam, lorazepam) - continuous infusion
- Benzodiazepine (e.g. diazepam, midazolam, lorazepam) - IV bolus prn
- Propofol infusion
- Dexmedetomidine infusion
- Other
- N/A - patient discharged on prior day
- N/A - patient day overlaps with a pre-operative day (and data have already been entered)  
(multi-pick, select all that were in place on this day)

Sedation Pre-Diagnosis Day 4 (4 days before the diagnosis)

- None
- Benzodiazepine (e.g. diazepam, midazolam, lorazepam) - continuous infusion
- Benzodiazepine (e.g. diazepam, midazolam, lorazepam) - IV bolus prn
- Propofol infusion
- Dexmedetomidine infusion
- Other
- N/A - patient discharged on prior day
- N/A - patient day overlaps with a pre-operative day (and data have already been entered)  
(multi-pick, select all that were in place on this day)

Sedation Pre-Diagnosis Day 5 (5 days before the diagnosis)

- None
- Benzodiazepine (e.g. diazepam, midazolam, lorazepam) - continuous infusion
- Benzodiazepine (e.g. diazepam, midazolam, lorazepam) - IV bolus prn
- Propofol infusion
- Dexmedetomidine infusion
- Other
- N/A - patient discharged on prior day
- N/A - patient day overlaps with a pre-operative day (and data have already been entered)  
(multi-pick, select all that were in place on this day)

Comments for this instrument and this abstraction

(\*\*Include comments for "other" analgesia and "other" sedation)

# Nursing Sensitive Process ICU Ventilator - Post-Operative Days 0-5

## Nursing Sensitive Process Measures - IHI Ventilator Bundle for ICU patients ONLY.

**\*\*Please complete the matrix and then use it as a worksheet to complete the variables below the matrix.**

|                                                                                        | Post Op Day 0<br>(POD 0) | POD 1                    | POD 2                    | POD 3                    | POD 4                    | POD 5                    |
|----------------------------------------------------------------------------------------|--------------------------|--------------------------|--------------------------|--------------------------|--------------------------|--------------------------|
| HOB elevated $\geq 30$ degrees                                                         | <input type="checkbox"/> |
| Oral Care                                                                              | <input type="checkbox"/> |
| Sedation interruption (SI) and spontaneous breathing trial (SBT)/readiness to extubate | <input type="checkbox"/> |
| Stress ulcer disease prophylaxis                                                       | <input type="checkbox"/> |
| Deep venous thrombosis prophylaxis                                                     | <input type="checkbox"/> |
| Vent Bundle All Items Complete                                                         | <input type="checkbox"/> |

### Postoperative Day 0 (POD 0)

HOB elevated  $\geq 30$  degrees POD 0

- No
- Yes
- N/A (pt discharged or extubated POD 0)
- Medical Contraindication per MD order (documentation that HOB was elevated at least once on POD 0)

Oral Care POD 0

- No
- Yes
- N/A (pt discharged or extubated POD 0)
- Medical Contraindication per MD order (documentation that oral care was done at least once on POD 0)

Sedation Interruption (SI) and Assessment of Readiness to Extubate/Spontaneous Breathing Trial (SBT) POD 0

- No
- Yes
- N/A (pt discharged or extubated POD 0)
- Medical Contraindication per MD order (documentation that SI and SBT were done at least once on POD 0)

Stress Ulcer Disease (SUD) Prophylaxis POD 0

- No
- Yes
- N/A (pt discharged or extubated POD 0)
- Medical Contraindication per MD order (documentation that SUD prophylaxis was given at least once on POD 0)

Deep Vein Thrombosis (DVT) Prophylaxis POD 0

- No
- Yes
- N/A (pt discharged or extubated POD 0)
- Medical Contraindication per MD order (documentation that DVT prophylaxis (mechanical leg pressure devices and/or anticoagulant medication) was given at least once on POD 0)

---

---

**Postoperative Day 1 (POD 1)**

HOB elevated  $\geq 30$  degrees POD 1

- No
- Yes
- N/A (pt discharged or extubated POD 1)
- Medical Contraindication per MD order (documentation that HOB was elevated at least once on POD 1)

Oral Care POD 1

- No
- Yes
- N/A (pt discharged or extubated POD 1)
- Medical Contraindication per MD order (documentation that oral care was done at least once on POD 1)

Sedation Interruption (SI) and Assessment of Readiness to Extubate/Spontaneous Breathing Trial (SBT) POD 1

- No
- Yes
- N/A (pt discharged or extubated POD 1)
- Medical Contraindication per MD order (documentation that SI and SBT were done at least once on POD 1)

Stress Ulcer Disease (SUD) Prophylaxis POD 1

- No
- Yes
- N/A (pt discharged or extubated POD 1)
- Medical Contraindication per MD order (documentation that SUD prophylaxis was given at least once on POD 1)

Deep Vein Thrombosis (DVT) Prophylaxis POD 1

- No
- Yes
- N/A (pt discharged or extubated POD 1)
- Medical Contraindication per MD order (documentation that DVT prophylaxis (mechanical leg pressure devices and/or anticoagulant medication) was given at least once on POD 1)

---

---

**Postoperative Day 2 (POD 2)**

HOB elevated  $\geq 30$  degrees POD 2

- No
- Yes
- N/A (pt discharged or extubated POD 2)
- Medical Contraindication per MD order (documentation that HOB was elevated at least once on POD 2)

Oral Care POD 2

- No
- Yes
- N/A (pt discharged or extubated POD 2)
- Medical Contraindication per MD order (documentation that oral care was done at least once on POD 2)

Sedation Interruption (SI) and Assessment of Readiness to Extubate/Spontaneous Breathing Trial (SBT) POD 2

- No
- Yes
- N/A (pt discharged or extubated POD 2)
- Medical Contraindication per MD order (documentation that SI and SBT were done at least once on POD 2)

Stress Ulcer Disease (SUD) Prophylaxis POD 2

- No
- Yes
- N/A (pt discharged or extubated POD 2)
- Medical Contraindication per MD order (documentation that SUD prophylaxis was given at least once on POD 2)

Deep Vein Thrombosis (DVT) Prophylaxis POD 2

- No
- Yes
- N/A (pt discharged or extubated POD 2)
- Medical Contraindication per MD order (documentation that DVT prophylaxis (mechanical leg pressure devices and/or anticoagulant medication) was given at least once on POD 2)

---

### Postoperative Day 3 (POD 3)

HOB elevated  $\geq 30$  degrees POD 3

- No
- Yes
- N/A (pt discharged or extubated POD 3)
- Medical Contraindication per MD order (documentation that HOB was elevated at least once on POD 3)

Oral Care POD 3

- No
- Yes
- N/A (pt discharged or extubated POD 3)
- Medical Contraindication per MD order (documentation that oral care was done at least once on POD 3)

Sedation Interruption (SI) and Assessment of Readiness to Extubate/Spontaneous Breathing Trial (SBT) POD 3

- No
- Yes
- N/A (pt discharged or extubated POD 3)
- Medical Contraindication per MD order (documentation that SI and SBT were done at least once on POD 3)

Stress Ulcer Disease (SUD) Prophylaxis POD 3

- No
- Yes
- N/A (pt discharged or extubated POD 3)
- Medical Contraindication per MD order (documentation that SUD prophylaxis was given at least once on POD 3)

Deep Vein Thrombosis (DVT) Prophylaxis POD 3

- No
- Yes
- N/A (pt discharged or extubated POD 3)
- Medical Contraindication per MD order (documentation that DVT prophylaxis (mechanical leg pressure devices and/or anticoagulant medication) was given at least once on POD 3)

---

---

**Postoperative Day 4 (POD 4)**

HOB elevated  $\geq 30$  degrees POD 4

- No
- Yes
- N/A (pt discharged or extubated POD 4)
- Medical Contraindication per MD order (documentation that HOB was elevated at least once on POD 4)

Oral Care POD 4

- No
- Yes
- N/A (pt discharged or extubated POD 4)
- Medical Contraindication per MD order (documentation that oral care was done at least once on POD 4)

Sedation Interruption (SI) and Assessment of Readiness to Extubate/Spontaneous Breathing Trial (SBT) POD 4

- No
- Yes
- N/A (pt discharged or extubated POD 4)
- Medical Contraindication per MD order (documentation that SI and SBT were done at least once on POD 4)

Stress Ulcer Disease (SUD) Prophylaxis POD 4

- No
- Yes
- N/A (pt discharged or extubated POD 4)
- Medical Contraindication per MD order (documentation that SUD prophylaxis was given at least once on POD 4)

Deep Vein Thrombosis (DVT) Prophylaxis POD 4

- No
- Yes
- N/A (pt discharged or extubated POD 4)
- Medical Contraindication per MD order (documentation that DVT prophylaxis (mechanical leg pressure devices and/or anticoagulant medication) was given at least once on POD 4)

---

---

**Postoperative Day 5 (POD 5)**

HOB elevated  $\geq 30$  degrees POD 5

- No
- Yes
- N/A (pt discharged or extubated POD 5)
- Medical Contraindication per MD order (documentation that HOB was elevated at least once on POD 5)

Oral Care POD 5

- No  
 Yes  
 N/A (pt discharged or extubated POD 5)  
 Medical Contraindication per MD order (documentation that oral care was done at least once on POD 5)

Sedation Interruption (SI) and Assessment of Readiness to Extubate/Spontaneous Breathing Trial (SBT) POD 5

- No  
 Yes  
 N/A (pt discharged or extubated POD 5)  
 Medical Contraindication per MD order (documentation that SI and SBT were done at least once on POD 5)

Stress Ulcer Disease (SUD) Prophylaxis POD 5

- No  
 Yes  
 N/A (pt discharged or extubated POD 5)  
 Medical Contraindication per MD order (documentation that SUD prophylaxis was given at least once on POD 5)

Deep Vein Thrombosis (DVT) Prophylaxis POD 5

- No  
 Yes  
 N/A (pt discharged or extubated POD 5)  
 Medical Contraindication per MD order (documentation that DVT prophylaxis (mechanical leg pressure devices and/or anticoagulant medication) was given at least once on POD 5)

---

### Overall Ventilator Bundle Compliance and Information

Ventilator bundle - all or none (as applicable to POD 0-5)

- No  
 Yes  
 N/A - patient not on ventilator on unit POD 0-5 ("All or none" is compliance with each element of the ventilator bundle each POD the patient was intubated (POD 0-5) - as noted by check boxes above. Medical contraindications documented by the MD count as "compliant")

Ventilator bundle elements for this hospital

- None/No formal bundle  
 Daily sedation safety screen  
 Daily sedation interruption  
 Daily breathing trial safety screen  
 Daily assessment of readiness to wean from the ventilator  
 Head of bed elevation  $\geq 30$  degrees  
 Daily oral care with chlorhexidine gluconate  
 Subglottic suctioning  
 Continuous subglottic suction endotracheal tubes  
 Endotracheal tube care - monitor cuff pressures  
 Endotracheal tube care - depth monitored

---

---

**Ventilator POD 6**

Ventilator POD 6

- No  
 Yes  
 N/A patient discharged prior to POD 6  
(IS the patient still intubated and on the ventilator on POD 6?)

Ventilator POD 6 reasons

- neurologic reason - e.g. need for sedation to manage ICP  
 cardiac reason - e.g. unstable cardiac rhythm (Afib with RVR, VT)  
 fluid overload - e.g. fluid balance impacting lungs (pulmonary edema, effusions, etc.)  
 sepsis - e.g. unstable and requires multiple vasoactive medications and IV fluids  
 pain - e.g. requires large doses of opioids for pain control  
 other  
(check all that apply (e.g. are documented by the MD on the POD 6 progress note for patients who remain on the ventilator) )

Comments for this instrument and this abstraction

---

## Nursing Sensitive Process ICU Ventilator - Pre-Diagnosis Days 0-5

These data fields are **ONLY** collected if the patient: **1) has a procedure diagnosis code date AND 2) the procedure code is NOT dated within the first 5 PODs AND 3) the patient is in the ICU on a ventilator.**

|                                                                                        | Pre-Diagnosis Day 0 (Predx 0) | Pre-Diagnosis Day 1      | Pre-Diagnosis Day 2      | Pre-Diagnosis Day 3      | Pre-Diagnosis Day 4      | Pre-Diagnosis Day 5      |
|----------------------------------------------------------------------------------------|-------------------------------|--------------------------|--------------------------|--------------------------|--------------------------|--------------------------|
| HOB elevated $\geq 30$ degrees                                                         | <input type="checkbox"/>      | <input type="checkbox"/> | <input type="checkbox"/> | <input type="checkbox"/> | <input type="checkbox"/> | <input type="checkbox"/> |
| Oral Care                                                                              | <input type="checkbox"/>      | <input type="checkbox"/> | <input type="checkbox"/> | <input type="checkbox"/> | <input type="checkbox"/> | <input type="checkbox"/> |
| Sedation interruption (SI) and spontaneous breathing trial (SBT)/readiness to extubate | <input type="checkbox"/>      | <input type="checkbox"/> | <input type="checkbox"/> | <input type="checkbox"/> | <input type="checkbox"/> | <input type="checkbox"/> |
| Stress ulcer disease prophylaxis                                                       | <input type="checkbox"/>      | <input type="checkbox"/> | <input type="checkbox"/> | <input type="checkbox"/> | <input type="checkbox"/> | <input type="checkbox"/> |
| Deep venous thrombosis prophylaxis                                                     | <input type="checkbox"/>      | <input type="checkbox"/> | <input type="checkbox"/> | <input type="checkbox"/> | <input type="checkbox"/> | <input type="checkbox"/> |
| Vent Bundle All Items Complete                                                         | <input type="checkbox"/>      | <input type="checkbox"/> | <input type="checkbox"/> | <input type="checkbox"/> | <input type="checkbox"/> | <input type="checkbox"/> |

These data fields are **ONLY** collected if the patient: **1) has a procedure diagnosis code date AND 2) the procedure code is NOT dated within the first 5 PODs AND 3) the patient is in the ICU. \*\*Note: only collect data for the dates that DO NOT overlap with POD 0-5. For example, if POD 5 is the same day as Pre-Diagnosis day 3, only collect the data for this day in the POD instrument. Make a note in the comments of the overlap - e.g. "Pre Dx day 3 = POD 5"**

Procedure/Diagnosis Code Date - present in UHC data file AND occurs outside of POD 0-5?

- No - diagnosis code only, no date present  
 Yes - procedure code present, with date  
 Yes - procedure code present AND outside of POD 0-5 (There will be a procedure code date for: 9604, 9672, 9671, and 9670. There will be no date for diagnosis codes 51851 and 51853.)

### Pre-Diagnosis Day 0 (predx 0) - the day of the qualifying procedure code

HOB elevated  $\geq 30$  degrees Pre-Diagnosis Day 0 (predx 0) - the day of the qualifying procedure code

- No  
 Yes  
 N/A (pt discharged or extubated predx 0)  
 Medical Contraindication per MD order (documentation that HOB was elevated at least once on this day)



Oral Care Pre-Diagnosis Day 0 (predx 0) - the day of the qualifying procedure code

- No  
 Yes  
 N/A (pt discharged or extubated predx 0)  
 Medical Contraindication per MD order (documentation that oral care was done at least once on this day)

Sedation Interruption (SI) and Assessment of Readiness to Extubate/Spontaneous Breathing Trial (SBT) Pre-Diagnosis Day 0 (predx 0) - the day of the qualifying procedure code

- No  
 Yes  
 N/A (pt discharged or extubated predx 0)  
 Medical Contraindication per MD order (documentation that SI and SBT were done at least once on this day)

Stress Ulcer Disease (SUD) Prophylaxis Pre-Diagnosis Day 0 (predx 0) - the day of the qualifying procedure code

- No  
 Yes  
 N/A (pt discharged or extubated predx 0)  
 Medical Contraindication per MD order (documentation that SUD prophylaxis was given at least once on this day)

Deep Vein Thrombosis (DVT) Prophylaxis Pre-Diagnosis Day 0 (predx 0) - the day of the qualifying procedure code

- No  
 Yes  
 N/A (pt discharged or extubated predx 0)  
 Medical Contraindication per MD order (documentation that DVT prophylaxis (mechanical leg pressure devices and/or anticoagulant medication) was given at least once on this day)

---

### Pre-Diagnosis Day 1 (predx 1) - the day before the qualifying procedure code

HOB elevated  $\geq 30$  degrees Pre-Diagnosis Day 1 (predx 1) - the day before the qualifying procedure code

- No  
 Yes  
 N/A (pt discharged or extubated predx1)  
 Medical Contraindication per MD order (documentation that HOB was elevated at least once on predx1)

Oral Care Pre-Diagnosis Day 1 (predx 1) - the day before the qualifying procedure code

- No  
 Yes  
 N/A (pt discharged or extubated predx1)  
 Medical Contraindication per MD order (documentation that oral care was done at least once on predx1)

Sedation Interruption (SI) and Assessment of Readiness to Extubate/Spontaneous Breathing Trial (SBT) Pre-Diagnosis Day 1 (predx 1) - the day before the qualifying procedure code

- No  
 Yes  
 N/A (pt discharged or extubated predx1)  
 Medical Contraindication per MD order (documentation that SI and SBT were done at least once on predx1)

Stress Ulcer Disease (SUD) Prophylaxis Pre-Diagnosis Day 1 (predx 1) - the day before the qualifying procedure code

- No  
 Yes  
 N/A (pt discharged or extubated predx1)  
 Medical Contraindication per MD order (documentation that SUD prophylaxis was given at least once on predx1)

Deep Vein Thrombosis (DVT) Prophylaxis Pre-Diagnosis Day 1 (predx 1) - the day before the qualifying procedure code

- No  
 Yes  
 N/A (pt discharged or extubated predx1)  
 Medical Contraindication per MD order (documentation that DVT prophylaxis (mechanical leg pressure devices and/or anticoagulant medication) was given at least once on predx1)

### Pre-Diagnosis Day 2 (predx 2) - two days before the qualifying procedure code

HOB elevated  $\geq 30$  degrees Pre-Diagnosis Day 2 (predx 2) - two days before the qualifying procedure code

- No  
 Yes  
 N/A (pt discharged or extubated predx2)  
 Medical Contraindication per MD order (documentation that HOB was elevated at least once on predx2)

Oral Care Pre-Diagnosis Day 2 (predx 2) - two days before the qualifying procedure code

- No  
 Yes  
 N/A (pt discharged or extubated predx2)  
 Medical Contraindication per MD order (documentation that oral care was done at least once on predx2)

Sedation Interruption (SI) and Assessment of Readiness to Extubate/Spontaneous Breathing Trial (SBT) Pre-Diagnosis Day 2 (predx 2) - two days before the qualifying procedure code

- No  
 Yes  
 N/A (pt discharged or extubated predx2)  
 Medical Contraindication per MD order (documentation that SI and SBT were done at least once on predx2)

Stress Ulcer Disease (SUD) Prophylaxis Pre-Diagnosis Day 2 (predx 2) - two days before the qualifying procedure code

- No  
 Yes  
 N/A (pt discharged or extubated predx2)  
 Medical Contraindication per MD order (documentation that SUD prophylaxis was given at least once on predx2)

Deep Vein Thrombosis (DVT) Prophylaxis Pre-Diagnosis Day 2 (predx 2) - two days before the qualifying procedure code

- No  
 Yes  
 N/A (pt discharged or extubated predx2)  
 Medical Contraindication per MD order (documentation that DVT prophylaxis (mechanical leg pressure devices and/or anticoagulant medication) was given at least once on predx2)

### Pre-Diagnosis Day 3 (predx 3) - three days before the qualifying procedure code

HOB elevated  $\geq 30$  degrees Pre-Diagnosis Day 3 (predx 3) - three days before the qualifying procedure code

- No  
 Yes  
 N/A (pt discharged or extubated predx3)  
 Medical Contraindication per MD order (documentation that HOB was elevated at least once on predx3)

Oral Care Pre-Diagnosis Day 3 (predx 3) - three days before the qualifying procedure code

- No  
 Yes  
 N/A (pt discharged or extubated predx3)  
 Medical Contraindication per MD order (documentation that oral care was done at least once on predx3)

Sedation Interruption (SI) and Assessment of Readiness to Extubate/Spontaneous Breathing Trial (SBT) Pre-Diagnosis Day 3 (predx 3) - three days before the qualifying procedure code

- No  
 Yes  
 N/A (pt discharged or extubated predx3)  
 Medical Contraindication per MD order (documentation that SI and SBT were done at least once on predx3)

Stress Ulcer Disease (SUD) Prophylaxis Pre-Diagnosis Day 3 (predx 3) - three days before the qualifying procedure code

- No  
 Yes  
 N/A (pt discharged or extubated predx3)  
 Medical Contraindication per MD order (documentation that SUD prophylaxis was given at least once on predx3)

Deep Vein Thrombosis (DVT) Prophylaxis Pre-Diagnosis Day 3 (predx 3) - three days before the qualifying procedure code

- No  
 Yes  
 N/A (pt discharged or extubated predx3)  
 Medical Contraindication per MD order (documentation that DVT prophylaxis (mechanical leg pressure devices and/or anticoagulant medication) was given at least once on predx3)

---

### Pre-Diagnosis Day 4 (predx 4) - four days before the qualifying procedure code

HOB elevated  $\geq 30$  degrees Pre-Diagnosis Day 4 (predx 4) - four days before the qualifying procedure code

- No  
 Yes  
 N/A (pt discharged or extubated predx4)  
 Medical Contraindication per MD order (documentation that HOB was elevated at least once on predx4)

Oral Care Pre-Diagnosis Day 4 (predx 4) - four days before the qualifying procedure code

- No  
 Yes  
 N/A (pt discharged or extubated predx4)  
 Medical Contraindication per MD order (documentation that oral care was done at least once on predx4)

Sedation Interruption (SI) and Assessment of Readiness to Extubate/Spontaneous Breathing Trial (SBT) Pre-Diagnosis Day 4 (predx 4) - four days before the qualifying procedure code

- No  
 Yes  
 N/A (pt discharged or extubated predx4)  
 Medical Contraindication per MD order (documentation that SI and SBT were done at least once on predx4)

Stress Ulcer Disease (SUD) Prophylaxis Pre-Diagnosis Day 4 (predx 4) - four days before the qualifying procedure code

- No  
 Yes  
 N/A (pt discharged or extubated predx4)  
 Medical Contraindication per MD order (documentation that SUD prophylaxis was given at least once on predx4)

Deep Vein Thrombosis (DVT) Prophylaxis Pre-Diagnosis Day 4 (predx 4) - four days before the qualifying procedure code

- No  
 Yes  
 N/A (pt discharged or extubated predx4)  
 Medical Contraindication per MD order (documentation that DVT prophylaxis (mechanical leg pressure devices and/or anticoagulant medication) was given at least once on predx4)

---

### Pre-Diagnosis Day 5 (predx 5) - five days before the qualifying procedure code

HOB elevated  $\geq 30$  degrees Pre-Diagnosis Day 5 (predx 5) - five days before the qualifying procedure code

- No  
 Yes  
 N/A (pt discharged or extubated predx5)  
 Medical Contraindication per MD order (documentation that HOB was elevated at least once on predx5)

Oral Care Pre-Diagnosis Day 5 (predx 5) - five days before the qualifying procedure code

- No  
 Yes  
 N/A (pt discharged or extubated predx5)  
 Medical Contraindication per MD order (documentation that oral care was done at least once on predx5)

Sedation Interruption (SI) and Assessment of Readiness to Extubate/Spontaneous Breathing Trial (SBT) Pre-Diagnosis Day 5 (predx 5) - five days before the qualifying procedure code

- No  
 Yes  
 N/A (pt discharged or extubated predx5)  
 Medical Contraindication per MD order (documentation that SI and SBT were done at least once on predx5)

Stress Ulcer Disease (SUD) Prophylaxis Pre-Diagnosis Day 5 (predx 5) - five days before the qualifying procedure code

- No  
 Yes  
 N/A (pt discharged or extubated predx5)  
 Medical Contraindication per MD order (documentation that SUD prophylaxis was given at least once on predx5)

Deep Vein Thrombosis (DVT) Prophylaxis Pre-Diagnosis Day 5 (predx 5) - five days before the qualifying procedure code

- No  
 Yes  
 N/A (pt discharged or extubated predx5)  
 Medical Contraindication per MD order (documentation that DVT prophylaxis (mechanical leg pressure devices and/or anticoagulant medication) was given at least once on predx5)

---

### Overall Ventilator Bundle Compliance and Information

Ventilator bundle - all or none (as applicable to Pre-Diagnosis Days 0-5)

- No  
 Yes  
 N/A - patient not on ventilator on unit predx 0-5 ("All or none" is compliance with each element of the ventilator bundle each predx day the patient was intubated (predx 0-5) - as noted by check boxes above. Medical contraindications documented by the MD count as "compliant")

Comments for this instrument and this abstraction

---

# Nursing Sensitive Process ICU Mobility - Post-Operative Days 0-5

## Nursing Sensitive Process Measures - SCCM ICU Liberation Bundle for ICU patients ONLY.

**\*\*Please complete the matrix and then use it as a worksheet to complete the variables below the matrix.**

**\*\* This section covers the ABCDE portions of the bundle. F for family was added later and is not included here.**

|                                                                  | Post Op Day 0<br>(POD 0) | POD 1                    | POD 2                    | POD 3                    | POD 4                    | POD 5                    |
|------------------------------------------------------------------|--------------------------|--------------------------|--------------------------|--------------------------|--------------------------|--------------------------|
| Pain assessed daily                                              | <input type="checkbox"/> |
| Pain high? (NRS>3; BPS>5; or CPOT>2)                             | <input type="checkbox"/> |
| Agitation assessed daily                                         | <input type="checkbox"/> |
| Sedation at target? (RASS -2, -1, or 0) or (SAS 3, or 4)         | <input type="checkbox"/> |
| Delirium assessed daily                                          | <input type="checkbox"/> |
| Delirium at target? (negative) (CAM-ICU negative) or (ICDSC <=4) | <input type="checkbox"/> |
| Sedation interruption or light sedation protocol daily           | <input type="checkbox"/> |
| Early Mobility daily                                             | <input type="checkbox"/> |

## Postoperative Day 0 (POD 0)

Pain assessed POD 0

- Not addressed/documented
- NRS (Numerical Rating Scale with patient self-report)
- BPS (Behavioral Pain Scale)
- CPOT (Critical Care Pain Observation Tool)
- N/A patient discharged from ICU on this POD (Check one to indicate the validated pain scale documented at least once on this POD)

Pain high POD 0

- No
- Yes (NRS>3, BPS>5, or CPOT>2) (Check "yes" if pain documented as NRS>3, BPS>5, or CPOT>2 at least once on this POD)

Agitation assessed POD 0

- Not addressed/documented
- RASS (Richmond Agitation Sedation Scale)
- SAS (Sedation Agitation Scale)
- N/A patient discharged from ICU on this POD (Check one to indicate the validated agitation scale documented at least once on this POD)

- Sedation at target POD 0
- No - (RASS -3, -4, -5, +1, +2, +3, +4) or (SAS 1, 2, 5, 6, 7)
  - Yes - (RASS -2, -1, or 0) or (SAS 3, or 4)  
(Check one based on worst score of the day. Worst score = most outside of desired range on this POD)
- Delirium assessed POD 0
- Not addressed/documented
  - CAM-ICU (Confusion Assessment Method for the ICU)
  - ICDSC (Intensive Care Delirium Screening Checklist)
  - N/A patient discharged from ICU on this POD  
(Check one to indicate if delirium was documented as present at least once on this POD)
- Delirium at target POD 0
- No - (CAM-ICU positive) or (ICDSC >4)
  - Yes - (CAM-ICU negative) or (ICDSC < =4)  
(Check one to indicate if delirium was documented as present at least once on this POD)
- Sedation interruption or Light sedation protocol POD 0
- Not addressed/documented
  - Sedation Interruption (SI) documented
  - Light Sedation Protocol (LSP) documented
  - N/A patient discharged from ICU on this POD
  - Medical Contraindication per MD order  
(Check one to indicate sedation interruption or light sedation protocol documented at least once on this POD)
- Mobility or Exercise POD 0
- Not documented/addressed
  - Passive range of motion
  - Sits up in bed
  - Sits on edge of bed and dangles legs
  - Transfers from bed to chair (with or without assist)
  - Ambulates with assist
  - Independent (ambulates without assist)
  - N/A patient discharged from ICU on this POD
  - Medical Contraindication per MD order  
(Check one to indicate the highest level of mobility documented at least once on this POD)

---

**POD 1**

- Pain assessed POD 1
- Not addressed/documented
  - NRS (Numerical Rating Scale with patient self-report)
  - BPS (Behavioral Pain Scale)
  - CPOT (Critical Care Pain Observation Tool)
  - N/A patient discharged from ICU on this POD  
(Check one to indicate the validated pain scale documented at least once on this POD)
- Pain high POD 1
- No
  - Yes (NRS>3, BPS>5, or CPOT>2)  
(Check "yes" if pain documented as NRS>3, BPS>5, or CPOT>2 at least once on this POD)

- Agitation assessed POD 1
- Not addressed/documented
  - RASS (Richmond Agitation Sedation Scale)
  - SAS (Sedation Agitation Scale)
  - N/A patient discharged from ICU on this POD  
(Check one to indicate the validated agitation scale documented at least once on this POD)
- Sedation at target POD 1
- No - (RASS -3, -4, -5, +1, +2, +3, +4) or (SAS 1, 2, 5, 6, 7)
  - Yes - (RASS -2, -1, or 0) or (SAS 3, or 4)  
(Check one based on worst score of the day. Worst score = most outside of desired range on this POD)
- Delirium assessed POD 1
- Not addressed/documented
  - CAM-ICU (Confusion Assessment Method for the ICU)
  - ICDSC (Intensive Care Delirium Screening Checklist)
  - N/A patient discharged from ICU on this POD  
(Check one to indicate if delirium was documented as present at least once on this POD)
- Delirium at target POD 1
- No - (CAM-ICU positive) or (ICDSC >4)
  - Yes - (CAM-ICU negative) or (ICDSC ≤ 4)  
(Check one to indicate if delirium was documented as present at least once on this POD)
- Sedation interruption or Light sedation protocol POD 1
- Not addressed/documented
  - Sedation Interruption (SI) documented
  - Light Sedation Protocol (LSP) documented
  - N/A patient discharged from ICU on this POD
  - Medical Contraindication per MD order  
(Check one to indicate sedation interruption or light sedation protocol documented at least once on this POD)
- Mobility or Exercise POD 1
- Not documented/addressed
  - Passive range of motion
  - Sits up in bed
  - Sits on edge of bed and dangles legs
  - Transfers from bed to chair (with or without assist)
  - Ambulates with assist
  - Independent (ambulates without assist)
  - N/A patient discharged from ICU on this POD
  - Medical Contraindication per MD order  
(Check one to indicate the highest level of mobility documented at least once on this POD)

---



---

## POD 2

- Pain assessed POD 2
- Not addressed/documented
  - NRS (Numerical Rating Scale with patient self-report)
  - BPS (Behavioral Pain Scale)
  - CPOT (Critical Care Pain Observation Tool)
  - N/A patient discharged from ICU on this POD  
(Check one to indicate the validated pain scale documented at least once on this POD)



- Pain high POD 2
- No
  - Yes (NRS>3, BPS>5, or CPOT>2)  
(Check "yes" if pain documented as NRS>3, BPS>5, or CPOT>2 at least once on this POD)
- Agitation assessed POD 2
- Not addressed/documentated
  - RASS (Richmond Agitation Sedation Scale)
  - SAS (Sedation Agitation Scale)
  - N/A patient discharged from ICU on this POD  
(Check one to indicate the validated agitation scale documented at least once on this POD)
- Sedation at target POD 2
- No - (RASS -3, -4, -5, +1, +2, +3, +4) or (SAS 1, 2, 5, 6, 7)
  - Yes - (RASS -2, -1, or 0) or (SAS 3, or 4)  
(Check one based on worst score of the day. Worst score = most outside of desired range on this POD)
- Delirium assessed POD 2
- Not addressed/documentated
  - CAM-ICU (Confusion Assessment Method for the ICU)
  - ICDSC (Intensive Care Delirium Screening Checklist)
  - N/A patient discharged from ICU on this POD  
(Check one to indicate if delirium was documented as present at least once on this POD)
- Delirium at target POD 2
- No - (CAM-ICU positive) or (ICDSC >4)
  - Yes - (CAM-ICU negative) or (ICDSC < =4)  
(Check one to indicate if delirium was documented as present at least once on this POD)
- Sedation interruption or Light sedation protocol POD 2
- Not addressed/documentated
  - Sedation Interruption (SI) documented
  - Light Sedation Protocol (LSP) documented
  - N/A patient discharged from ICU on this POD
  - Medical Contraindication per MD order  
(Check one to indicate sedation interruption or light sedation protocol documented at least once on this POD)
- Mobility or Exercise POD 2
- Not documented/addressed
  - Passive range of motion
  - Sits up in bed
  - Sits on edge of bed and dangles legs
  - Transfers from bed to chair (with or without assist)
  - Ambulates with assist
  - Independent (ambulates without assist)
  - N/A patient discharged from ICU on this POD
  - Medical Contraindication per MD order  
(Check one to indicate the highest level of mobility documented at least once on this POD)

---



---

**POD 3**

- Pain assessed POD 3
- Not addressed/documented
  - NRS (Numerical Rating Scale with patient self-report)
  - BPS (Behavioral Pain Scale)
  - CPOT (Critical Care Pain Observation Tool)
  - N/A patient discharged from ICU on this POD (Check one to indicate the validated pain scale documented at least once on this POD)
- Pain high POD 3
- No
  - Yes (NRS>3, BPS>5, or CPOT>2) (Check "yes" if pain documented as NRS>3, BPS>5, or CPOT>2 at least once on this POD)
- Agitation assessed POD 3
- Not addressed/documented
  - RASS (Richmond Agitation Sedation Scale)
  - SAS (Sedation Agitation Scale)
  - N/A patient discharged from ICU on this POD (Check one to indicate the validated agitation scale documented at least once on this POD)
- Sedation at target POD 3
- No - (RASS -3, -4, -5, +1, +2, +3, +4) or (SAS 1, 2, 5, 6, 7)
  - Yes - (RASS -2, -1, or 0) or (SAS 3, or 4) (Check one based on worst score of the day. Worst score = most outside of desired range on this POD)
- Delirium assessed POD 3
- Not addressed/documented
  - CAM-ICU (Confusion Assessment Method for the ICU)
  - ICDSC (Intensive Care Delirium Screening Checklist)
  - N/A patient discharged from ICU on this POD (Check one to indicate if delirium was documented as present at least once on this POD)
- Delirium at target POD 3
- No - (CAM-ICU positive) or (ICDSC >4)
  - Yes - (CAM-ICU negative) or (ICDSC < =4) (Check one to indicate if delirium was documented as present at least once on this POD)
- Sedation interruption or Light sedation protocol POD 3
- Not addressed/documented
  - Sedation Interruption (SI) documented
  - Light Sedation Protocol (LSP) documented
  - N/A patient discharged from ICU on this POD
  - Medical Contraindication per MD order (Check one to indicate sedation interruption or light sedation protocol documented at least once on this POD)
- Mobility or Exercise POD 3
- Not documented/addressed
  - Passive range of motion
  - Sits up in bed
  - Sits on edge of bed and dangles legs
  - Transfers from bed to chair (with or without assist)
  - Ambulates with assist
  - Independent (ambulates without assist)
  - N/A patient discharged from ICU on this POD
  - Medical Contraindication per MD order (Check one to indicate the highest level of mobility documented at least once on this POD)

---

---

**POD 4**

Pain assessed POD 4

- Not addressed/documented
- NRS (Numerical Rating Scale with patient self-report)
- BPS (Behavioral Pain Scale)
- CPOT (Critical Care Pain Observation Tool)
- N/A patient discharged from ICU on this POD (Check one to indicate the validated pain scale documented at least once on this POD)

Pain high POD 4

- No
- Yes (NRS>3, BPS>5, or CPOT>2) (Check "yes" if pain documented as NRS>3, BPS>5, or CPOT>2 at least once on this POD)

Agitation assessed POD 4

- Not addressed/documented
- RASS (Richmond Agitation Sedation Scale)
- SAS (Sedation Agitation Scale)
- N/A patient discharged from ICU on this POD (Check one to indicate the validated agitation scale documented at least once on this POD)

Sedation at target POD 4

- No - (RASS -3, -4, -5, +1, +2, +3, +4) or (SAS 1, 2, 5, 6, 7)
- Yes - (RASS -2, -1, or 0) or (SAS 3, or 4) (Check one based on worst score of the day. Worst score = most outside of desired range on this POD)

Delirium assessed POD 4

- Not addressed/documented
- CAM-ICU (Confusion Assessment Method for the ICU)
- ICDSC (Intensive Care Delirium Screening Checklist)
- N/A patient discharged from ICU on this POD (Check one to indicate if delirium was documented as present at least once on this POD)

Delirium at target POD 4

- No - (CAM-ICU positive) or (ICDSC >4)
- Yes - (CAM-ICU negative) or (ICDSC < =4) (Check one to indicate if delirium was documented as present at least once on this POD)

Sedation interruption or Light sedation protocol POD 4

- Not addressed/documented
- Sedation Interruption (SI) documented
- Light Sedation Protocol (LSP) documented
- N/A patient discharged from ICU on this POD
- Medical Contraindication per MD order (Check one to indicate sedation interruption or light sedation protocol documented at least once on this POD)

Mobility or Exercise POD 4

- Not documented/addressed
  - Passive range of motion
  - Sits up in bed
  - Sits on edge of bed and dangles legs
  - Transfers from bed to chair (with or without assist)
  - Ambulates with assist
  - Independent (ambulates without assist)
  - N/A patient discharged from ICU on this POD
  - Medical Contraindication per MD order
- (Check one to indicate the highest level of mobility documented at least once on this POD)

**POD 5**

Pain assessed POD 5

- Not addressed/documentated
  - NRS (Numerical Rating Scale with patient self-report)
  - BPS (Behavioral Pain Scale)
  - CPOT (Critical Care Pain Observation Tool)
  - N/A patient discharged from ICU on this POD
- (Check one to indicate the validated pain scale documented at least once on this POD)

Pain high POD 5

- No
  - Yes (NRS>3, BPS>5, or CPOT>2)
- (Check "yes" if pain documented as NRS>3, BPS>5, or CPOT>2 at least once on this POD)

Agitation assessed POD 5

- Not addressed/documentated
  - RASS (Richmond Agitation Sedation Scale)
  - SAS (Sedation Agitation Scale)
  - N/A patient discharged from ICU on this POD
- (Check one to indicate the validated agitation scale documented at least once on this POD)

Sedation at target POD 5

- No - (RASS -3, -4, -5, +1, +2, +3, +4) or (SAS 1, 2, 5, 6, 7)
  - Yes - (RASS -2, -1, or 0) or (SAS 3, or 4)
- (Check one based on worst score of the day. Worst score = most outside of desired range on this POD)

Delirium assessed POD 5

- Not addressed/documentated
  - CAM-ICU (Confusion Assessment Method for the ICU)
  - ICDSC (Intensive Care Delirium Screening Checklist)
  - N/A patient discharged from ICU on this POD
- (Check one to indicate if delirium was documented as present at least once on this POD)

Delirium at target POD 5

- No - (CAM-ICU positive) or (ICDSC >4)
  - Yes - (CAM-ICU negative) or (ICDSC < =4)
- (Check one to indicate if delirium was documented as present at least once on this POD)

Sedation interruption or Light sedation protocol POD  
5

- Not addressed/documented
- Sedation Interruption (SI) documented
- Light Sedation Protocol (LSP) documented
- N/A patient discharged from ICU on this POD
- Medical Contraindication per MD order  
(Check one to indicate sedation interruption or light sedation protocol documented at least once on this POD)

Mobility or Exercise POD 5

- Not documented/addressed
- Passive range of motion
- Sits up in bed
- Sits on edge of bed and dangles legs
- Transfers from bed to chair (with or without assist)
- Ambulates with assist
- Independent (ambulates without assist)
- N/A patient discharged from ICU on this POD
- Medical Contraindication per MD order  
(Check one to indicate the highest level of mobility documented at least once on this POD)

Comments for this instrument and this abstraction

---

## Nursing Sensitive Process ICU Mobility - Pre-Diagnosis Days 0-5

**These data fields are ONLY collected if the patient: 1) has a procedure diagnosis code date AND 2) the procedure code is NOT dated within the first 5 PODs AND 3) the patient is in the ICU.**

|                                                                  | Pre-Diagnosis Day 0 (Predx | Pre-Diagnosis Day 1 (Predx | Pre-Diagnosis Day 2 (Predx | Pre-Diagnosis Day 3 (Predx | Pre-Diagnosis Day 4 (Predx | Pre-Diagnosis Day 5 (Predx |
|------------------------------------------------------------------|----------------------------|----------------------------|----------------------------|----------------------------|----------------------------|----------------------------|
| Pain assessed daily                                              | <input type="checkbox"/>   |
| Pain high? (NRS>3; BPS>5; or CPOT>2)                             | <input type="checkbox"/>   |
| Agitation assessed daily                                         | <input type="checkbox"/>   |
| Sedation at target? (RASS -2, -1, or 0) or (SAS 3, or 4)         | <input type="checkbox"/>   |
| Delirium assessed daily                                          | <input type="checkbox"/>   |
| Delirium at target? (negative) (CAM-ICU negative) or (ICDSC <=4) | <input type="checkbox"/>   |
| Sedation interruption or light sedation protocol daily           | <input type="checkbox"/>   |
| Early Mobility daily                                             | <input type="checkbox"/>   |

**These data fields are ONLY collected if the patient: 1) has a procedure diagnosis code date AND 2) the procedure code is NOT dated within the first 5 PODs AND 3) the patient is in the ICU. \*\*Note: only collect data for the dates that DO NOT overlap with POD 0-5. For example, if POD 5 is the same day as Pre-Diagnosis day 3, only collect the data for this day in the POD instrument. Make a note in the comments of the overlap - e.g. "Pre Dx day 3 = POD 5"**

Procedure/Diagnosis Code Date - present in UHC data file AND occurs outside of POD 0-5?

- No - diagnosis code only, no date present
- Yes - procedure code present, with date
- Yes - procedure code present AND outside of POD 0-5 (There will be a procedure code date for: 9604, 9672, 9671, and 9670. There will be no date for diagnosis codes 51851 and 51853.)

---

---

**Pre-Diagnosis Day 0 (Predx 0) - the day of the procedure code diagnosis**

Pain Pre-Diagnosis Day 0 (Predx 0)

- Not addressed/documented
- NRS (Numerical Rating Scale with patient self-report)
- BPS (Behavioral Pain Scale)
- CPOT (Critical Care Pain Observation Tool)
- N/A patient discharged from ICU on this day  
(Check one to indicate the validated pain scale documented at least once on this day)

Pain high Predx 0

- No
- Yes (NRS>3, BPS>5, or CPOT>2)  
(Check "yes" if pain documented as NRS>3, BPS>5, or CPOT>2 at least once on this day)

Agitation assessed Predx 0

- Not addressed/documented
- RASS (Richmond Agitation Sedation Scale)
- SAS (Sedation Agitation Scale)
- N/A patient discharged from ICU on this day  
(Check one to indicate the validated agitation scale documented at least once on this day)

Sedation at target Predx 0

- No - (RASS -3, -4, -5, +1, +2, +3, +4) or (SAS 1, 2, 5, 6, 7)
- Yes - (RASS -2, -1, or 0) or (SAS 3, or 4)  
(Check one based on worst score of the day. Worst score = most outside of desired range on this day)

Delirium assessed Predx 0

- Not addressed/documented
- CAM-ICU (Confusion Assessment Method for the ICU)
- ICDSC (Intensive Care Delirium Screening Checklist)
- N/A patient discharged from ICU on this day  
(Check one to indicate if delirium was documented as present at least once on this day)

Delirium at target Predx 0

- No - (CAM-ICU positive) or (ICDSC >4)
- Yes - (CAM-ICU negative) or (ICDSC < =4)  
(Check one to indicate if delirium was documented as present at least once on this day)

Sedation interruption or Light sedation protocol  
Predx 0

- Not addressed/documented
- Sedation Interruption (SI) documented
- Light Sedation Protocol (LSP) documented
- N/A patient discharged from ICU on this day
- Medical Contraindication per MD order  
(Check one to indicate sedation interruption or light sedation protocol documented at least once on this day)

Mobility or Exercise Predx 0

- Not documented/addressed
- Passive range of motion
- Sits up in bed
- Sits on edge of bed and dangles legs
- Transfers from bed to chair (with or without assist)
- Ambulates with assist
- Independent (ambulates without assist)
- N/A patient discharged from ICU on this day
- Medical Contraindication per MD order  
(Check one to indicate the highest level of mobility documented at least once on this day)

---



---

**Pre-Diagnosis Day 1 (Predx 1) - the day before the procedure code diagnosis**

Pain assessed Predx 1

- Not addressed/documentated
- NRS (Numerical Rating Scale with patient self-report)
- BPS (Behavioral Pain Scale)
- CPOT (Critical Care Pain Observation Tool)
- N/A patient discharged from ICU on this day  
(Check one to indicate the validated pain scale documented at least once on this day)

Pain high Predx 1

- No
- Yes (NRS>3, BPS>5, or CPOT>2)  
(Check "yes" if pain documented as NRS>3, BPS>5, or CPOT>2 at least once on this day)

Agitation assessed Predx 1

- Not addressed/documentated
- RASS (Richmond Agitation Sedation Scale)
- SAS (Sedation Agitation Scale)
- N/A patient discharged from ICU on this day  
(Check one to indicate the validated agitation scale documented at least once on this day)

Sedation at target Predx 1

- No - (RASS -3, -4, -5, +1, +2, +3, +4) or (SAS 1, 2, 5, 6, 7)
- Yes - (RASS -2, -1, or 0) or (SAS 3, or 4)  
(Check one based on worst score of the day. Worst score = most outside of desired range on this day)

Delirium assessed Predx 1

- Not addressed/documentated
- CAM-ICU (Confusion Assessment Method for the ICU)
- ICDSC (Intensive Care Delirium Screening Checklist)
- N/A patient discharged from ICU on this day  
(Check one to indicate if delirium was documented as present at least once on this day)

Delirium at target Predx 1

- No - (CAM-ICU positive) or (ICDSC >4)
- Yes - (CAM-ICU negative) or (ICDSC < =4)  
(Check one to indicate if delirium was documented as present at least once on this day)



Sedation interruption or Light sedation protocol  
Predx 1

- Not addressed/documented
- Sedation Interruption (SI) documented
- Light Sedation Protocol (LSP) documented
- N/A patient discharged from ICU on this day
- Medical Contraindication per MD order  
(Check one to indicate sedation interruption or light sedation protocol documented at least once on this day)

Mobility or Exercise Predx 1

- Not documented/addressed
- Passive range of motion
- Sits up in bed
- Sits on edge of bed and dangles legs
- Transfers from bed to chair (with or without assist)
- Ambulates with assist
- Independent (ambulates without assist)
- N/A patient discharged from ICU on this day
- Medical Contraindication per MD order  
(Check one to indicate the highest level of mobility documented at least once on this day)

---



---

### Pre-Diagnosis Day 2 (Predx 2) - two days before the procedure code diagnosis

Pain assessed Predx 2

- Not addressed/documented
- NRS (Numerical Rating Scale with patient self-report)
- BPS (Behavioral Pain Scale)
- CPOT (Critical Care Pain Observation Tool)
- N/A patient discharged from ICU on this day  
(Check one to indicate the validated pain scale documented at least once on this day)

Pain high Predx 2

- No
- Yes (NRS>3, BPS>5, or CPOT>2)  
(Check "yes" if pain documented as NRS>3, BPS>5, or CPOT>2 at least once on this day)

Agitation assessed Predx 2

- Not addressed/documented
- RASS (Richmond Agitation Sedation Scale)
- SAS (Sedation Agitation Scale)
- N/A patient discharged from ICU on this day  
(Check one to indicate the validated agitation scale documented at least once on this day)

Sedation at target Predx 2

- No - (RASS -3, -4, -5, +1, +2, +3, +4) or (SAS 1, 2, 5, 6, 7)
- Yes - (RASS -2, -1, or 0) or (SAS 3, or 4)  
(Check one based on worst score of the day. Worst score = most outside of desired range on this day)

Delirium assessed Predx 2

- Not addressed/documented
- CAM-ICU (Confusion Assessment Method for the ICU)
- ICDSC (Intensive Care Delirium Screening Checklist)
- N/A patient discharged from ICU on this day  
(Check one to indicate if delirium was documented as present at least once on this day)

Delirium at target Predx 2

- No - (CAM-ICU positive) or (ICDSC >4)
- Yes - (CAM-ICU negative) or (ICDSC ≤ 4)  
(Check one to indicate if delirium was documented as present at least once on this day)

Sedation interruption or Light sedation protocol Predx 2

- Not addressed/documented
- Sedation Interruption (SI) documented
- Light Sedation Protocol (LSP) documented
- N/A patient discharged from ICU on this day
- Medical Contraindication per MD order  
(Check one to indicate sedation interruption or light sedation protocol documented at least once on this day)

Mobility or Exercise Predx 2

- Not documented/addressed
- Passive range of motion
- Sits up in bed
- Sits on edge of bed and dangles legs
- Transfers from bed to chair (with or without assist)
- Ambulates with assist
- Independent (ambulates without assist)
- N/A patient discharged from ICU on this day
- Medical Contraindication per MD order  
(Check one to indicate the highest level of mobility documented at least once on this day)

---

### Pre-Diagnosis Day 3 (Predx 3) - three days before the procedure code diagnosis

Pain assessed Predx 3

- Not addressed/documented
- NRS (Numerical Rating Scale with patient self-report)
- BPS (Behavioral Pain Scale)
- CPOT (Critical Care Pain Observation Tool)
- N/A patient discharged from ICU on this day  
(Check one to indicate the validated pain scale documented at least once on this day)

Pain high Predx 3

- No
- Yes (NRS > 3, BPS > 5, or CPOT > 2)  
(Check "yes" if pain documented as NRS > 3, BPS > 5, or CPOT > 2 at least once on this day)

Agitation assessed Predx 3

- Not addressed/documented
- RASS (Richmond Agitation Sedation Scale)
- SAS (Sedation Agitation Scale)
- N/A patient discharged from ICU on this day  
(Check one to indicate the validated agitation scale documented at least once on this day)

Sedation at target Predx 3

- No - (RASS -3, -4, -5, +1, +2, +3, +4) or (SAS 1, 2, 5, 6, 7)
- Yes - (RASS -2, -1, or 0) or (SAS 3, or 4)  
(Check one based on worst score of the day. Worst score = most outside of desired range on this day)

Delirium assessed Predx 3

- Not addressed/documentated
- CAM-ICU (Confusion Assessment Method for the ICU)
- ICDSC (Intensive Care Delirium Screening Checklist)
- N/A patient discharged from ICU on this day  
(Check one to indicate if delirium was documented as present at least once on this day)

Delirium at target Predx 3

- No - (CAM-ICU positive) or (ICDSC >4)
- Yes - (CAM-ICU negative) or (ICDSC < =4)  
(Check one to indicate if delirium was documented as present at least once on this day)

Sedation interruption or Light sedation protocol  
Predx 3

- Not addressed/documentated
- Sedation Interruption (SI) documented
- Light Sedation Protocol (LSP) documented
- N/A patient discharged from ICU on this day
- Medical Contraindication per MD order  
(Check one to indicate sedation interruption or light sedation protocol documented at least once on this day)

Mobility or Exercise Predx 3

- Not documented/addressed
- Passive range of motion
- Sits up in bed
- Sits on edge of bed and dangles legs
- Transfers from bed to chair (with or without assist)
- Ambulates with assist
- Independent (ambulates without assist)
- N/A patient discharged from ICU on this day
- Medical Contraindication per MD order  
(Check one to indicate the highest level of mobility documented at least once on this day)

---



---

**Pre-Diagnosis Day 4 (Predx 4) - four days before the procedure code diagnosis**

Pain assessed Predx 4

- Not addressed/documentated
- NRS (Numerical Rating Scale with patient self-report)
- BPS (Behavioral Pain Scale)
- CPOT (Critical Care Pain Observation Tool)
- N/A patient discharged from ICU on this day  
(Check one to indicate the validated pain scale documented at least once on this day)

Pain high Predx 4

- No
- Yes (NRS>3, BPS>5, or CPOT>2)  
(Check "yes" if pain documented as NRS>3, BPS>5, or CPOT>2 at least once on this day)

Agitation assessed Predx 4

- Not addressed/documentated
- RASS (Richmond Agitation Sedation Scale)
- SAS (Sedation Agitation Scale)
- N/A patient discharged from ICU on this day  
(Check one to indicate the validated agitation scale documented at least once on this day)

- Sedation at target Predx 4
- No - (RASS -3, -4, -5, +1, +2, +3, +4) or (SAS 1, 2, 5, 6, 7)
  - Yes - (RASS -2, -1, or 0) or (SAS 3, or 4)  
(Check one based on worst score of the day. Worst score = most outside of desired range on this day)
- Delirium assessed Predx 4
- Not addressed/documentated
  - CAM-ICU (Confusion Assessment Method for the ICU)
  - ICDSC (Intensive Care Delirium Screening Checklist)
  - N/A patient discharged from ICU on this day  
(Check one to indicate if delirium was documented as present at least once on this day)
- Delirium at target Predx 4
- No - (CAM-ICU positive) or (ICDSC >4)
  - Yes - (CAM-ICU negative) or (ICDSC < =4)  
(Check one to indicate if delirium was documented as present at least once on this day)
- Sedation interruption or Light sedation protocol Predx 4
- Not addressed/documentated
  - Sedation Interruption (SI) documented
  - Light Sedation Protocol (LSP) documented
  - N/A patient discharged from ICU on this day
  - Medical Contraindication per MD order  
(Check one to indicate sedation interruption or light sedation protocol documented at least once on this day)
- Mobility or Exercise Predx 4
- Not documented/addressed
  - Passive range of motion
  - Sits up in bed
  - Sits on edge of bed and dangles legs
  - Transfers from bed to chair (with or without assist)
  - Ambulates with assist
  - Independent (ambulates without assist)
  - N/A patient discharged from ICU on this day
  - Medical Contraindication per MD order  
(Check one to indicate the highest level of mobility documented at least once on this day)

---

### Pre-Diagnosis Day 5 (Predx 5) - five days before the procedure code diagnosis

- Pain assessed Predx 5
- Not addressed/documentated
  - NRS (Numerical Rating Scale with patient self-report)
  - BPS (Behavioral Pain Scale)
  - CPOT (Critical Care Pain Observation Tool)
  - N/A patient discharged from ICU on this day  
(Check one to indicate the validated pain scale documented at least once on this day)
- Pain high Predx 5
- No
  - Yes (NRS>3, BPS>5, or CPOT>2)  
(Check "yes" if pain documented as NRS>3, BPS>5, or CPOT>2 at least once on this day)

Agitation assessed Predx 5

- Not addressed/documentated
- RASS (Richmond Agitation Sedation Scale)
- SAS (Sedation Agitation Scale)
- N/A patient discharged from ICU on this day  
(Check one to indicate the validated agitation scale documented at least once on this day)

Sedation at target Predx 5

- No - (RASS -3, -4, -5, +1, +2, +3, +4) or (SAS 1, 2, 5, 6, 7)
- Yes - (RASS -2, -1, or 0) or (SAS 3, or 4)  
(Check one based on worst score of the day. Worst score = most outside of desired range on this day)

Delirium assessed Predx 5

- Not addressed/documentated
- CAM-ICU (Confusion Assessment Method for the ICU)
- ICDSC (Intensive Care Delirium Screening Checklist)
- N/A patient discharged from ICU on this day  
(Check one to indicate if delirium was documented as present at least once on this day)

Delirium at target Predx 5

- No - (CAM-ICU positive) or (ICDSC >4)
- Yes - (CAM-ICU negative) or (ICDSC < =4)  
(Check one to indicate if delirium was documented as present at least once on this day)

Sedation interruption or Light sedation protocol  
Predx 5

- Not addressed/documentated
- Sedation Interruption (SI) documented
- Light Sedation Protocol (LSP) documented
- N/A patient discharged from ICU on this day
- Medical Contraindication per MD order  
(Check one to indicate sedation interruption or light sedation protocol documented at least once on this day)

Mobility or Exercise Predx 5

- Not documented/addressed
- Passive range of motion
- Sits up in bed
- Sits on edge of bed and dangles legs
- Transfers from bed to chair (with or without assist)
- Ambulates with assist
- Independent (ambulates without assist)
- N/A patient discharged from ICU on this day
- Medical Contraindication per MD order  
(Check one to indicate the highest level of mobility documented at least once on this day)

Comments for this instrument and this abstraction

---

## Comments

Enter any general/overall comments for this chart abstraction

---
